# Supplementary material for: Synthesis and Evaluation of Amide and Thiourea Derivatives as Carbonic Anhydrase (CA) Inhibitors
Source: PubMed Central journal article supplement — ACS Omega. 2022 Dec 6;7(50):47251–64. doi: 10.1021/acsomega.2c06513 (PMC9773353; doi:10.1021/acsomega.2c06513), 2022-12-06
Supplement: ao2c06513_si_001.pdf [file ao2c06513_si_001.pdf]

# Synthesis and evaluation of amide and thioureas derivatives as Carbonic Anhydrase (CAs) inhibitors

Zahid Hussain<sup>\*1</sup>, Abid Mahmood<sup>2</sup>, Qasim Shah<sup>2</sup>, Aqeel Imran<sup>2</sup>, Ehsan Ullah Mughal<sup>3</sup>, Wajiha Khan<sup>4</sup>, Ayesha Baig<sup>4</sup>, Jamshed Iqbal<sup>\*2</sup>, Amara Mumtaz<sup>\*1</sup>

<sup>1</sup>Department of Chemistry, COMSATS University Islamabad, Abbottabad Campus, Abbottabad 22060, Pakistan.

<sup>2</sup>Center for Advance Drug Research, COMSATS University Islamabad, Abbottabad Campus, Abbottabad 22060, Pakistan.

<sup>3</sup>Department of Chemistry University of Gujrat, Gujrat 50700, Pakistan.

<sup>4</sup>Department of Biotechnology, COMSATS University Islamabad, Abbottabad Campus, Abbottabad 22060, Pakistan.

## List of Figure

|                                                      |    |
|------------------------------------------------------|----|
| Figure S1: <sup>1</sup> H NMR of compound 20 .....   | 3  |
| Figure S2: <sup>13</sup> C NMR of compound 20 .....  | 3  |
| Figure S3: <sup>1</sup> H NMR of compound 22 .....   | 4  |
| Figure S4: <sup>13</sup> C NMR of compound 22 .....  | 4  |
| Figure S5: <sup>1</sup> H NMR of compound 23 .....   | 5  |
| Figure S6: <sup>13</sup> C NMR of compound 23 .....  | 5  |
| Figure S7: <sup>1</sup> H NMR of compound 21 .....   | 6  |
| Figure S8: <sup>13</sup> C NMR of compound 21 .....  | 6  |
| Figure S9: <sup>1</sup> H NMR of compound 18 .....   | 7  |
| Figure S10: <sup>13</sup> C NMR of compound 18 ..... | 7  |
| Figure S11: <sup>1</sup> H NMR of compound 17 .....  | 8  |
| Figure S12: <sup>13</sup> C NMR of compound 17 ..... | 8  |
| Figure S13: <sup>1</sup> H NMR of compound 12 .....  | 9  |
| Figure S14: <sup>13</sup> C NMR of compound 12 ..... | 9  |
| Figure S15: <sup>1</sup> H NMR of compound 09 .....  | 10 |
| Figure S16: <sup>13</sup> C NMR of compound 09 ..... | 10 |
| Figure S17: <sup>1</sup> H NMR of compound 24 .....  | 11 |
| Figure S18: <sup>13</sup> C NMR of compound 24 ..... | 11 |
| Figure S19: <sup>1</sup> H NMR of compound 26 .....  | 12 |
| Figure S20: <sup>13</sup> C NMR of compound 26 ..... | 12 |
| Figure S21: <sup>1</sup> H NMR of compound 10 .....  | 13 |
| Figure S22: <sup>13</sup> C NMR of compound 10 ..... | 13 |
| Figure S23: <sup>1</sup> H NMR of compound 11 .....  | 14 |
| Figure S24: <sup>13</sup> C NMR of compound 11 ..... | 14 |

|                                                                                                                                                                                                                                                                                                   |    |
|---------------------------------------------------------------------------------------------------------------------------------------------------------------------------------------------------------------------------------------------------------------------------------------------------|----|
| Figure S25: <sup>1</sup> H NMR of compound 14 .....                                                                                                                                                                                                                                               | 15 |
| Figure S26: <sup>13</sup> C NMR of compound 14 .....                                                                                                                                                                                                                                              | 15 |
| Figure S27: <sup>1</sup> H NMR of compound 15 .....                                                                                                                                                                                                                                               | 16 |
| Figure S28: <sup>13</sup> C NMR of compound 15 .....                                                                                                                                                                                                                                              | 16 |
| Figure S29: <sup>1</sup> H NMR of compound 25 .....                                                                                                                                                                                                                                               | 17 |
| Figure S30: <sup>13</sup> C NMR of compound 25 .....                                                                                                                                                                                                                                              | 17 |
| Figure S31: <sup>1</sup> H NMR of compound 13 .....                                                                                                                                                                                                                                               | 18 |
| Figure S32: <sup>13</sup> C NMR of compound 13 .....                                                                                                                                                                                                                                              | 18 |
| Figure S33: IR graph of Compound 20 .....                                                                                                                                                                                                                                                         | 19 |
| Figure S34: IR graph of Compound 23 .....                                                                                                                                                                                                                                                         | 19 |
| Figure S35: IR graph of Compound 21 .....                                                                                                                                                                                                                                                         | 20 |
| Figure S36: IR graph of Compound 18 .....                                                                                                                                                                                                                                                         | 20 |
| Figure S37: IR graph of Compound 17 .....                                                                                                                                                                                                                                                         | 21 |
| Figure S38: IR graph of Compound 12 .....                                                                                                                                                                                                                                                         | 21 |
| Figure S39: IR graph of Compound 20 .....                                                                                                                                                                                                                                                         | 22 |
| Figure S40: IR graph of Compound 24 .....                                                                                                                                                                                                                                                         | 22 |
| Figure S41: IR graph of Compound 26 .....                                                                                                                                                                                                                                                         | 23 |
| Figure S42: IR graph of Compound 10 .....                                                                                                                                                                                                                                                         | 23 |
| Figure S43: IR graph of Compound 11 .....                                                                                                                                                                                                                                                         | 24 |
| Figure S44: IR graph of Compound 14 .....                                                                                                                                                                                                                                                         | 24 |
| Figure S45: IR graph of Compound 15 .....                                                                                                                                                                                                                                                         | 25 |
| Figure S46: IR graph of Compound 25 .....                                                                                                                                                                                                                                                         | 25 |
| Figure S47: IR graph of Compound 20 .....                                                                                                                                                                                                                                                         | 26 |
| Figure S48: HPLC chromatogram of compound 20 and 23 .....                                                                                                                                                                                                                                         | 27 |
| Figure S49: Analysis of cell viability/cytotoxicity using HEK-293 cells treated with compounds 1 –17 at final concentration (100 μM).<br>Statistics indicating significant values *p < 0.05, **p < 0.01, ***p < 0.001 vs. untreated group. Cisplatin (100 μM) is used as a positive control. .... | 34 |
| Figure S50: 2D interaction of Compound <b>09</b> .....                                                                                                                                                                                                                                            | 35 |
| Figure S51: 2D interaction and geometrical graph of compound 11.....                                                                                                                                                                                                                              | 35 |
| Figure S52: 2D interaction Compound 12.....                                                                                                                                                                                                                                                       | 36 |
| Figure S53: 2D interaction Compound 18.....                                                                                                                                                                                                                                                       | 36 |

## List of Tables

|                                                              |    |
|--------------------------------------------------------------|----|
| Table S1: IC <sub>50</sub> values and Graphs of hCA II ..... | 29 |
| Table S2: IC <sub>50</sub> vales and Graphs of hCA IX .....  | 32 |
| Table S3: IC <sub>50</sub> vales and Graphs of hCA XII ..... | 34 |

# 1.1 Proton NMR, <sup>13</sup>C Spectra of the synthesized compounds

## Compound 20

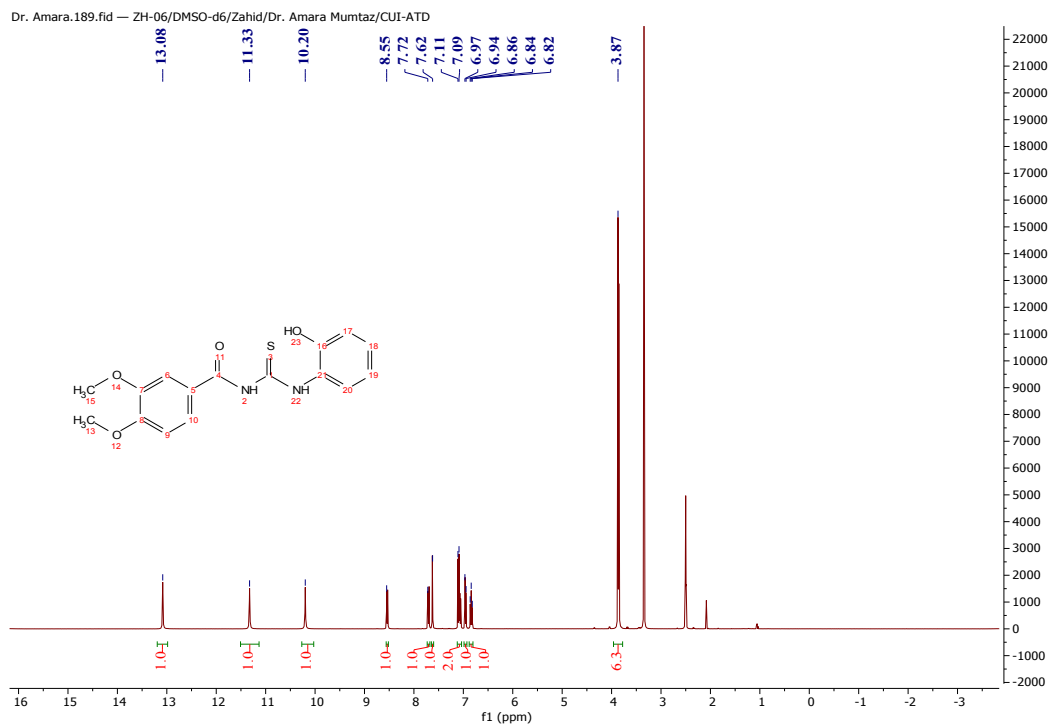

Figure S1: <sup>1</sup>H NMR of compound 20

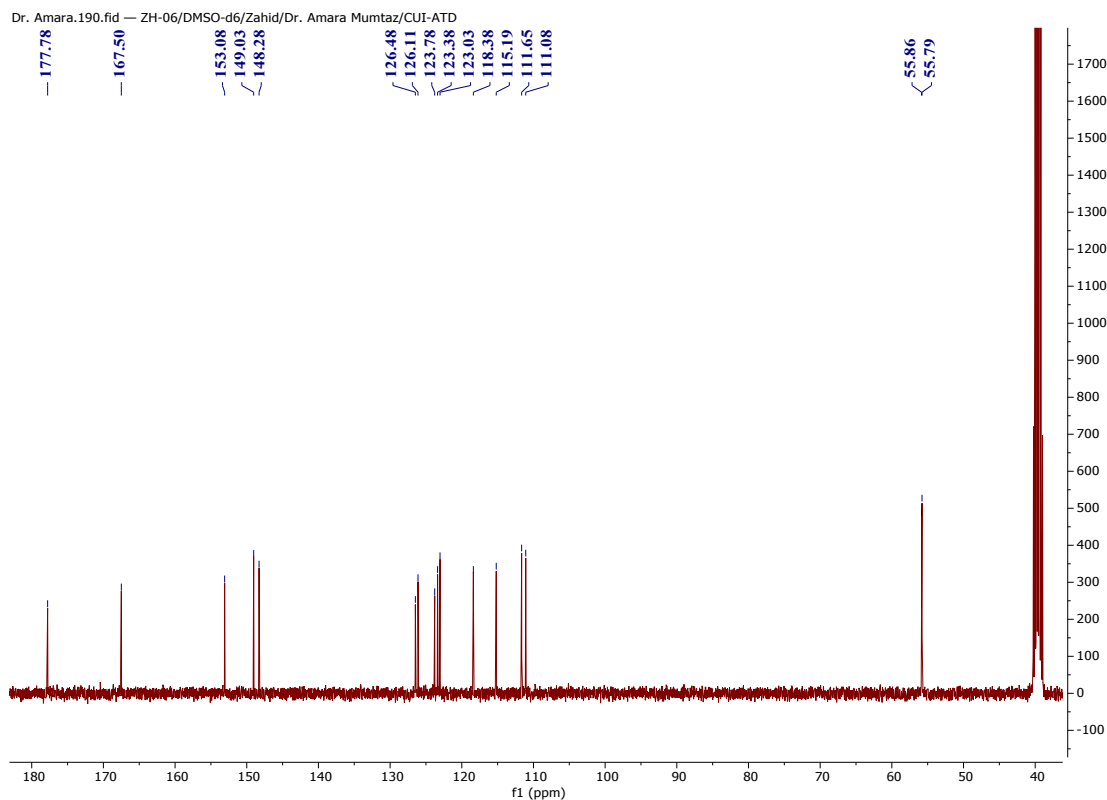

Figure S2: <sup>13</sup>C NMR of compound 20

# Compound 22

Dr. Amara.193.fid — ZH-09/DMSO-d6/Zahid/Dr. Amara Mumtaz/CUI-ATD

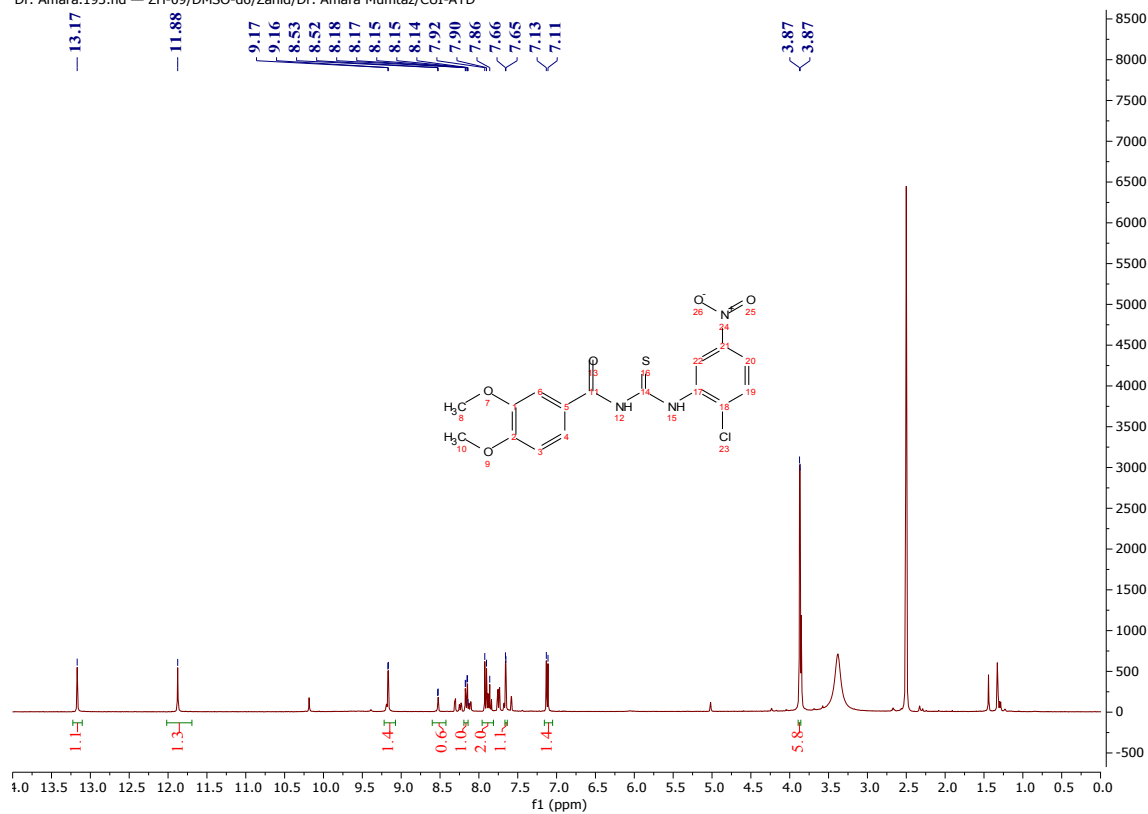

Figure S3: <sup>1</sup>H NMR of compound 22

Dr. Amara.194.fid — ZH-09/DMSO-d6/Zahid/Dr. Amara Mumtaz/CUI-ATD

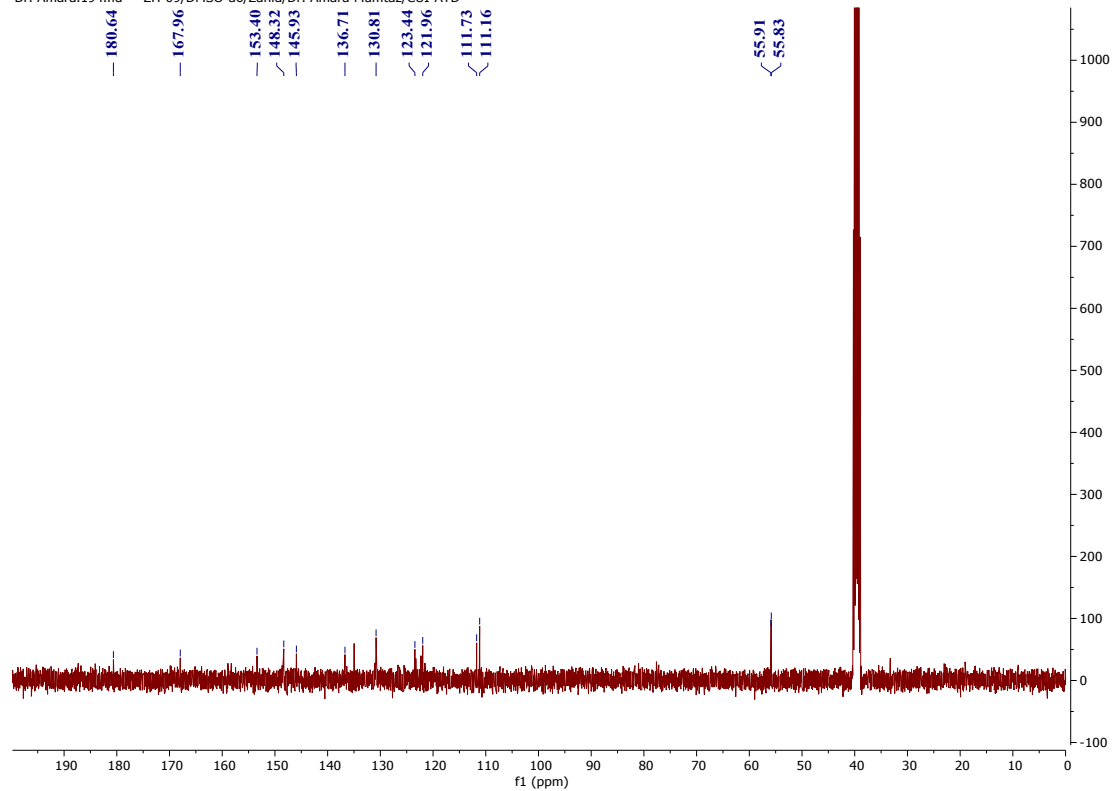

Figure S4: <sup>13</sup>C NMR of compound 22

# Compound 23

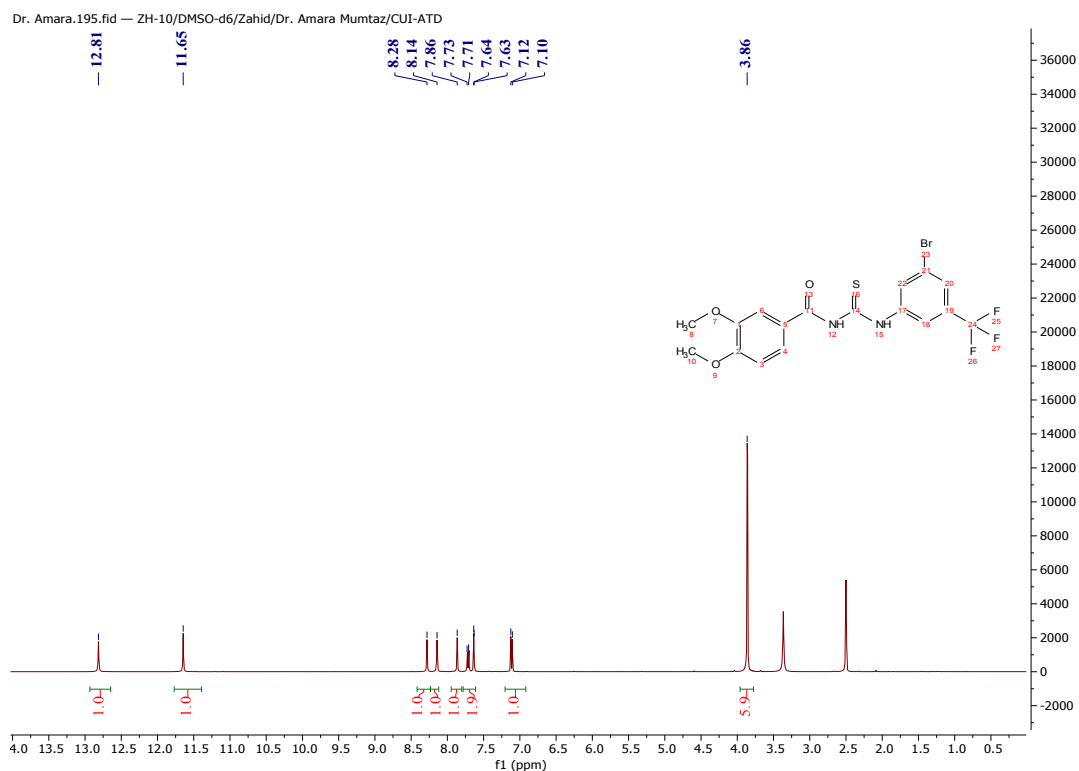

Figure S5:  $^1\text{H}$  NMR of compound 23

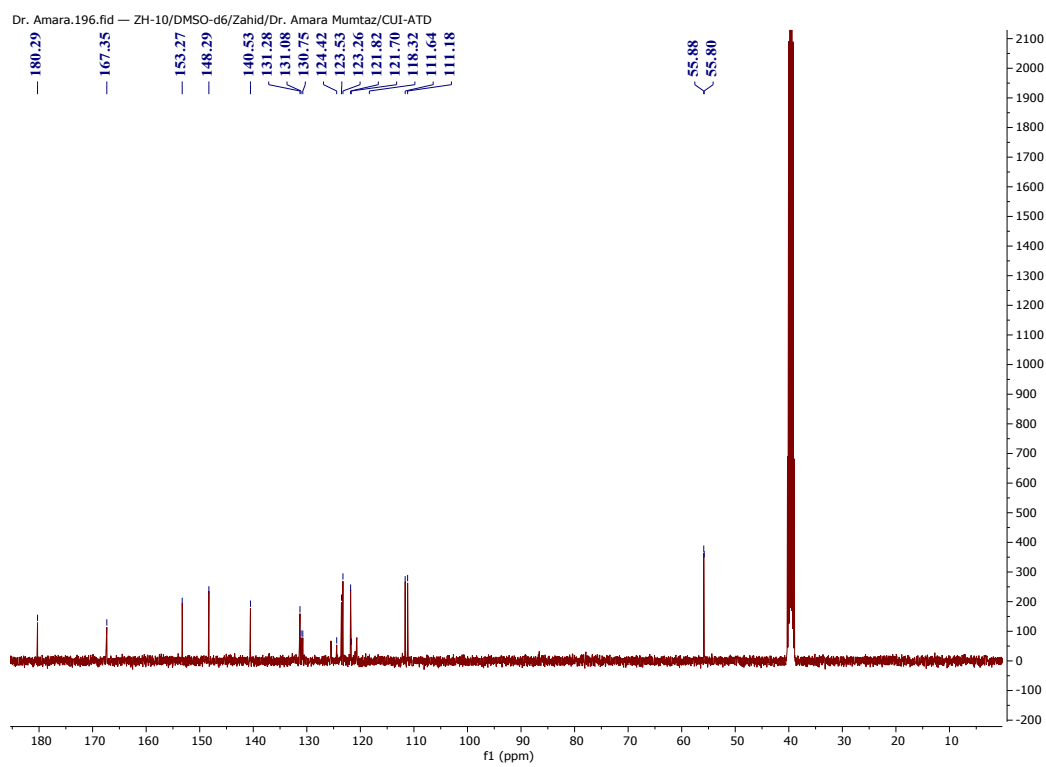

Figure S6:  $^{13}\text{C}$  NMR of compound 23

# Compound 21

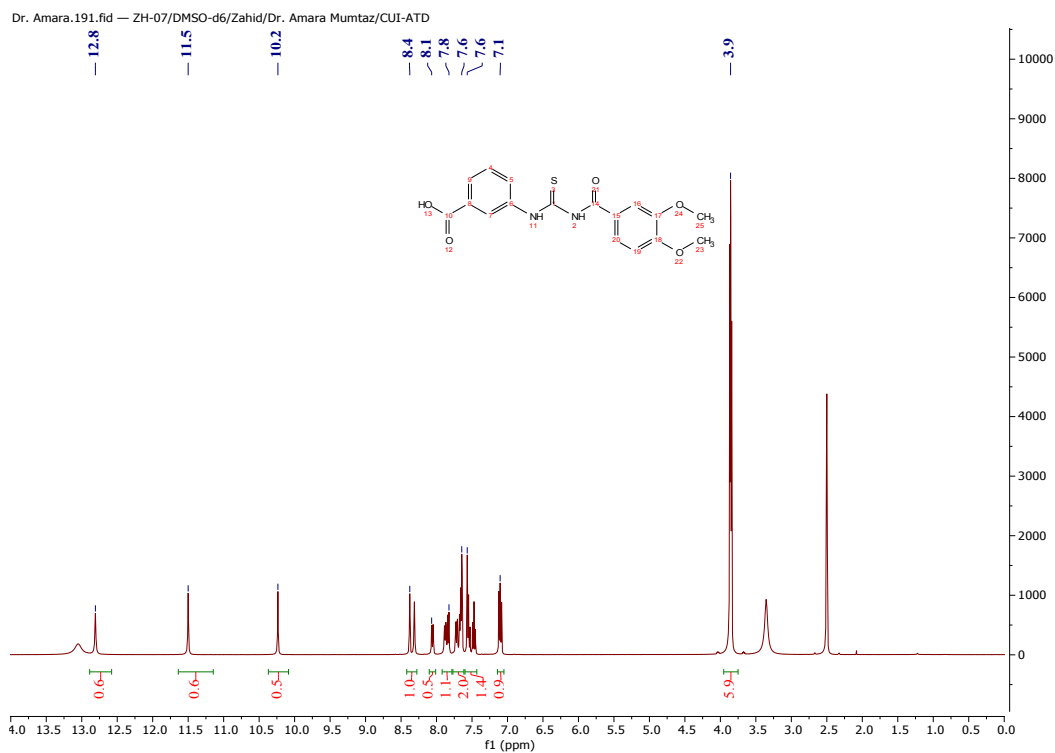

Figure S7:  $^1\text{H}$  NMR of compound 21

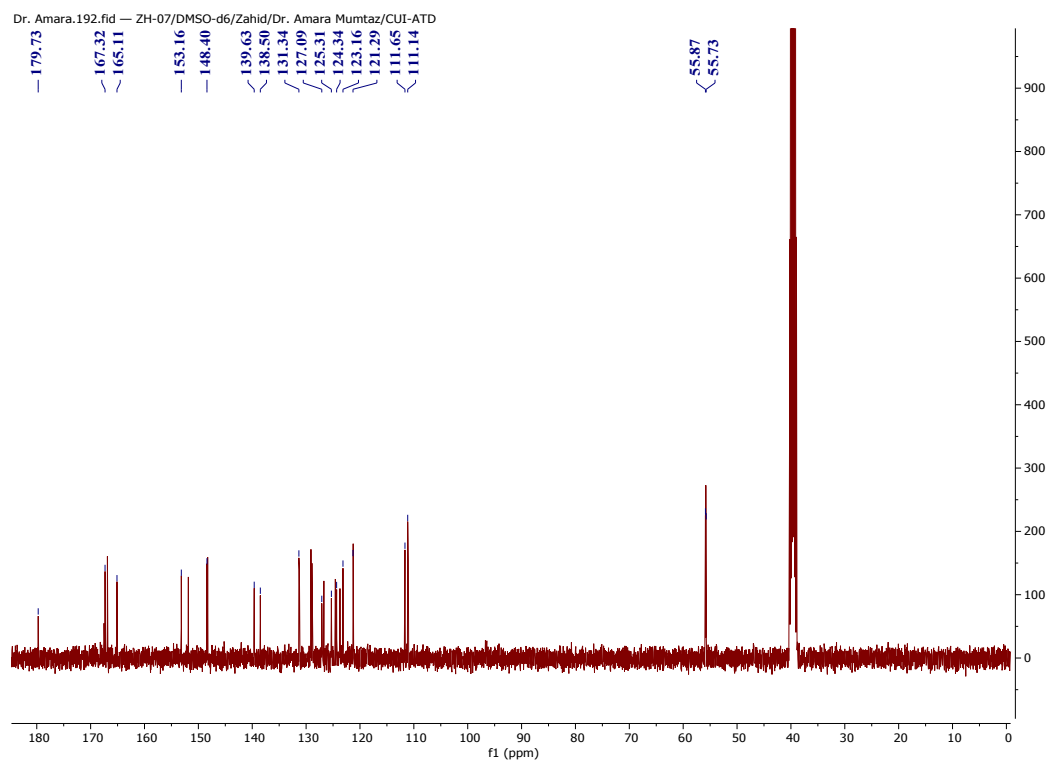

Figure S8:  $^{13}\text{C}$  NMR of compound 21

# Compound 18

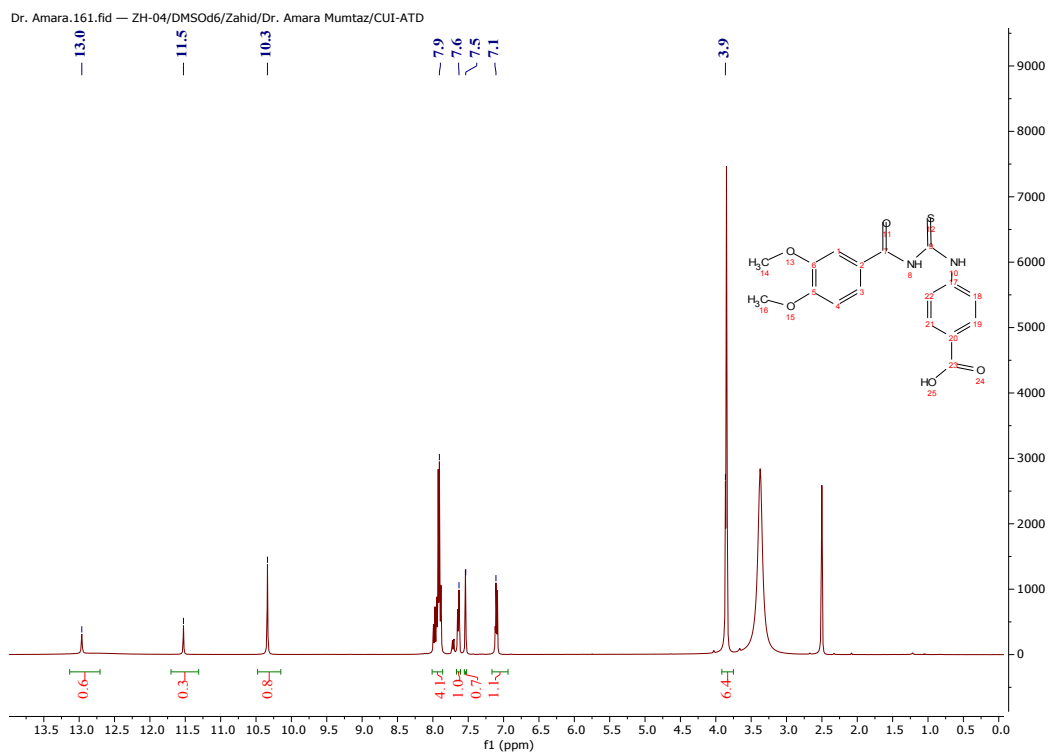

Figure S9:  $^1\text{H}$  NMR of compound 18

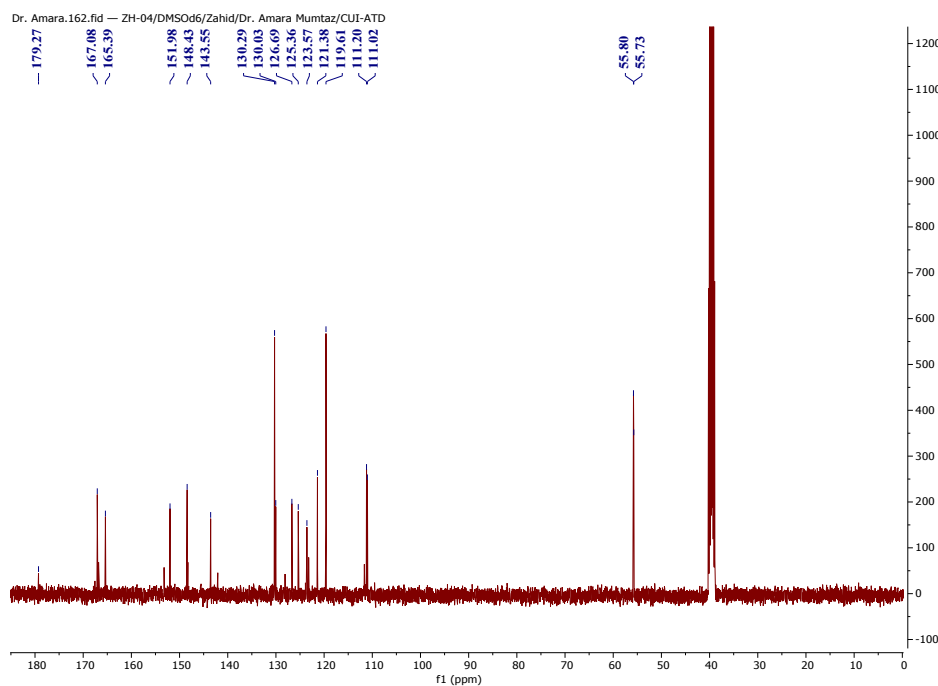

Figure S10:  $^{13}\text{C}$  NMR of compound 18

# Compound 17

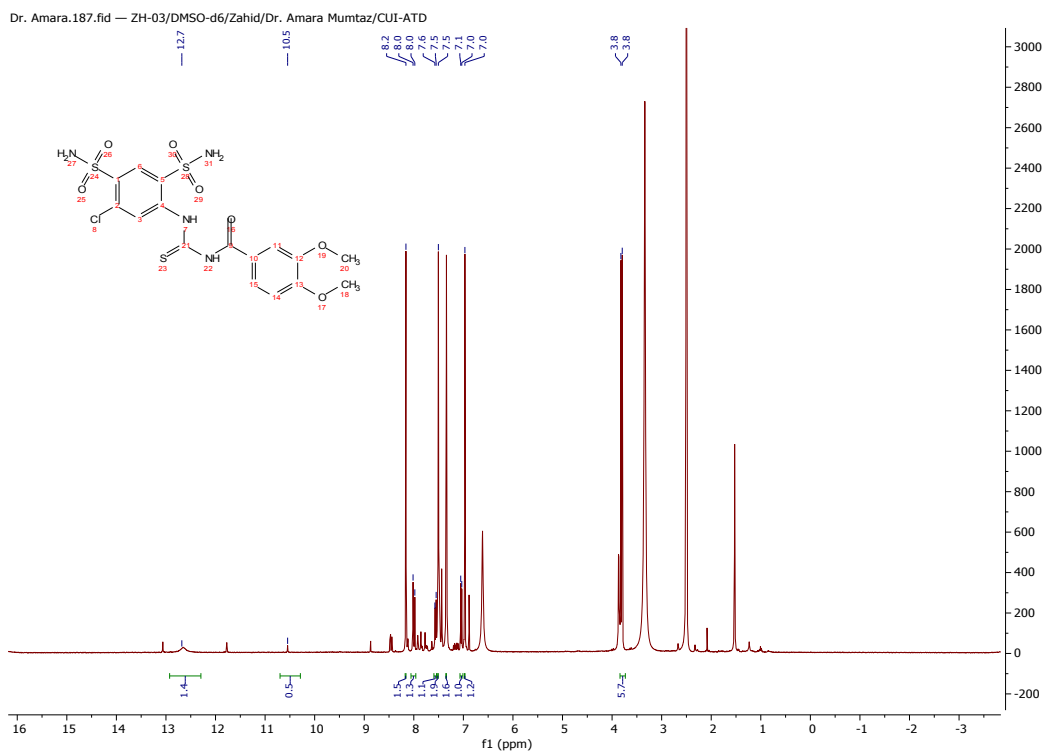

Figure S11:  $^1\text{H}$  NMR of compound 17

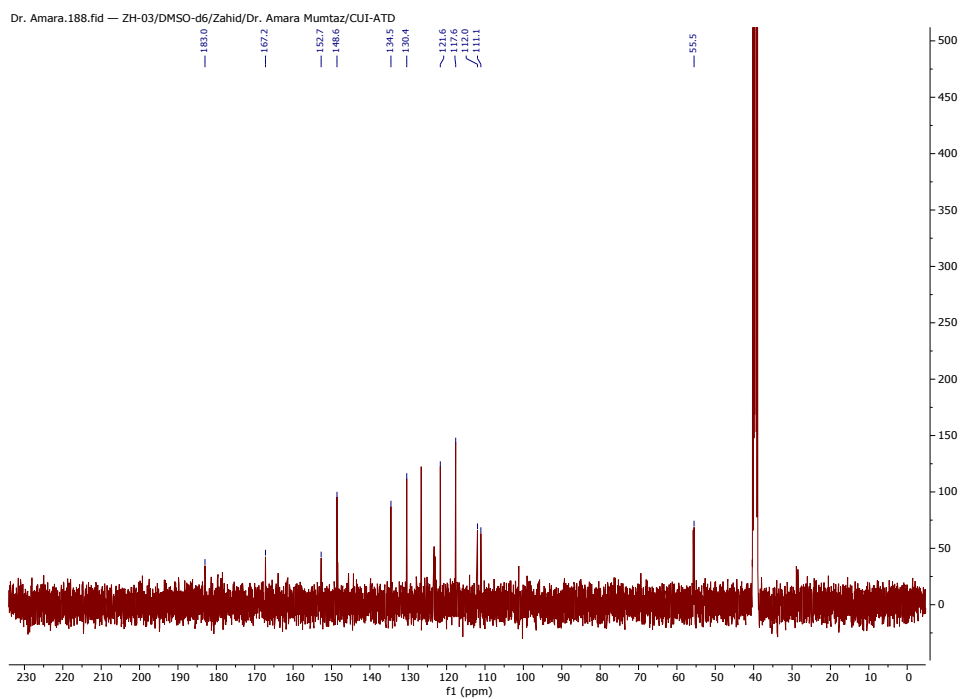

Figure S12:  $^{13}\text{C}$  NMR of compound 17



# Compound 12

Dr. Amara.157.fid — ZH-01/DMSOd6/Zahid/Dr. Amara Mumtaz CUI-ATD

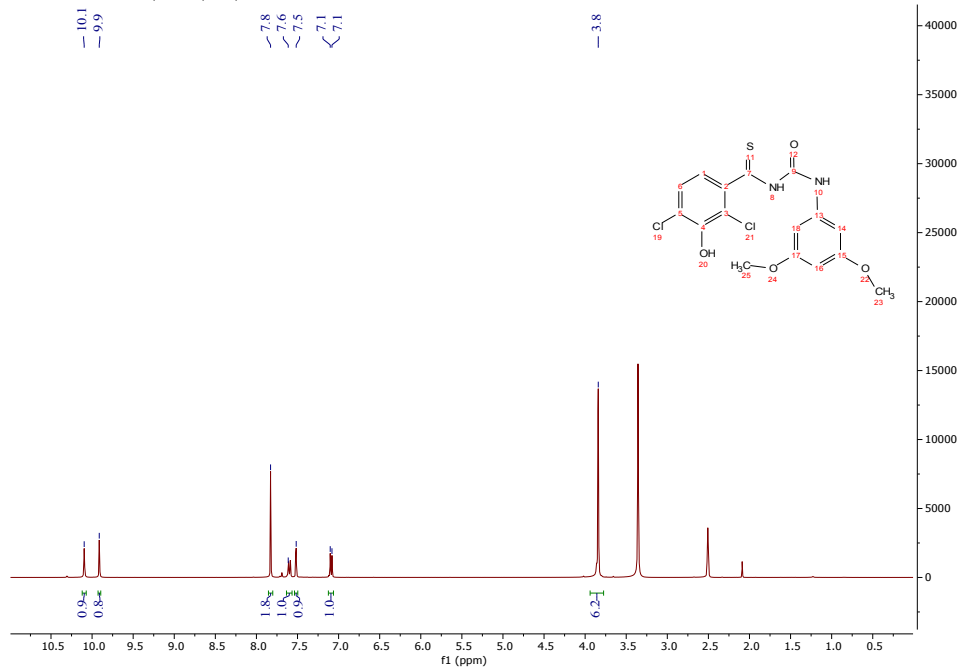

Figure S13:  $^1\text{H}$  NMR of compound 12

Dr. Amara.158.fid — ZH-01/DMSOd6/Zahid/Dr. Amara Mumtaz CUI-ATD

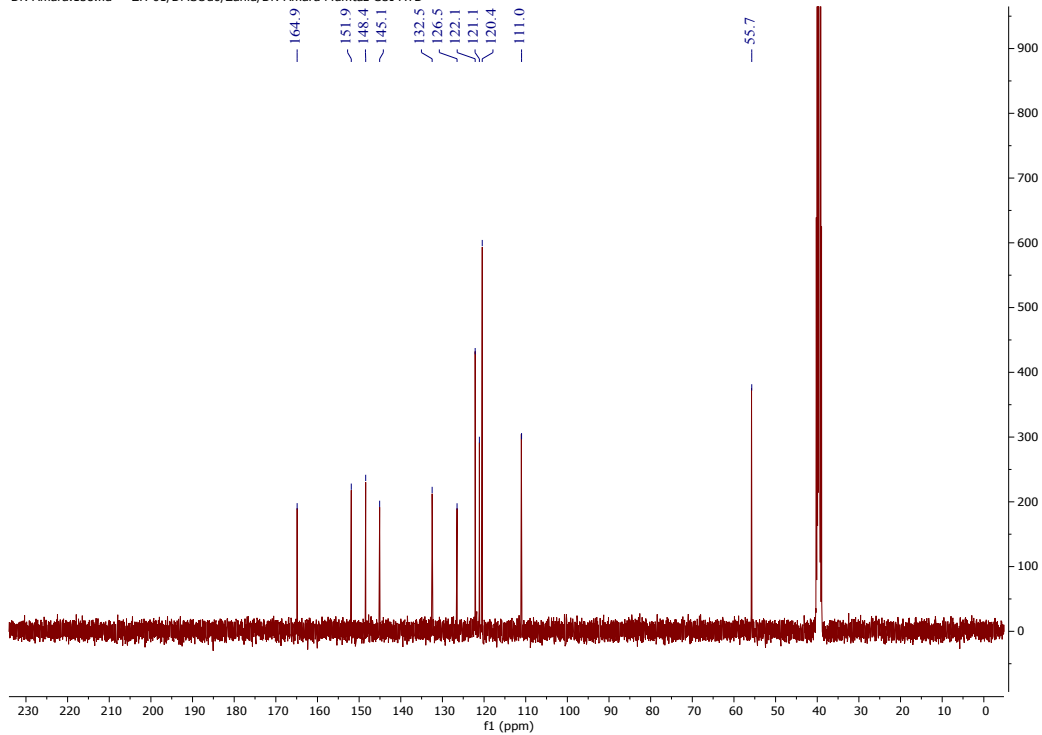

Figure S14:  $^{13}\text{C}$  NMR of compound 12

# Compound 09

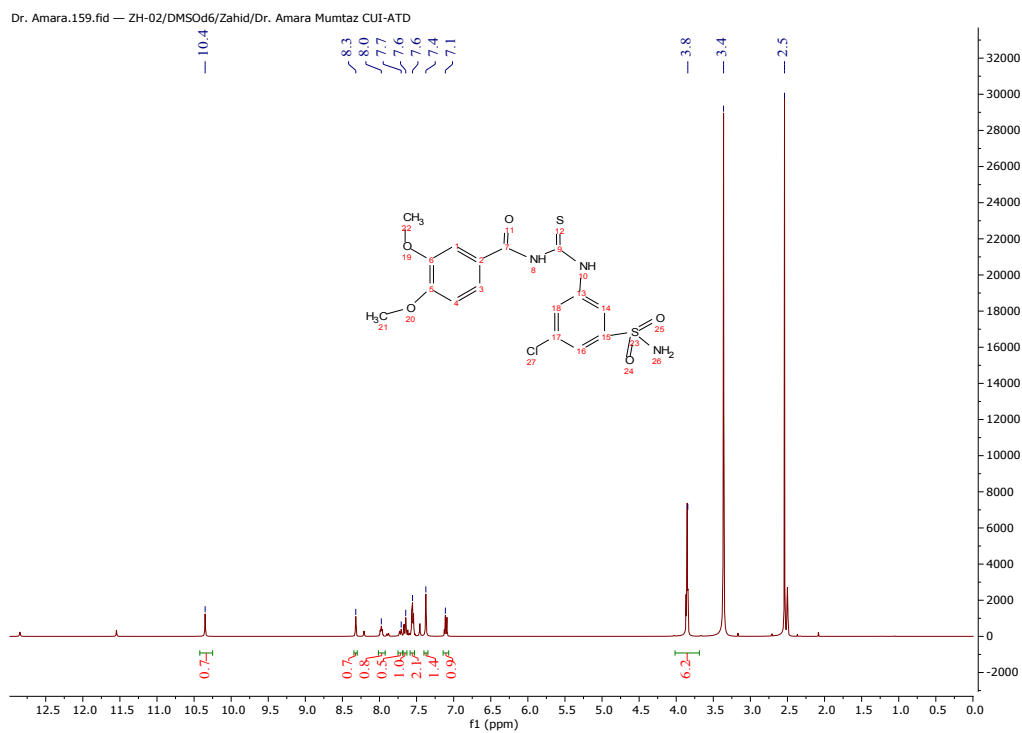

Figure S15: <sup>1</sup>H NMR of compound 09

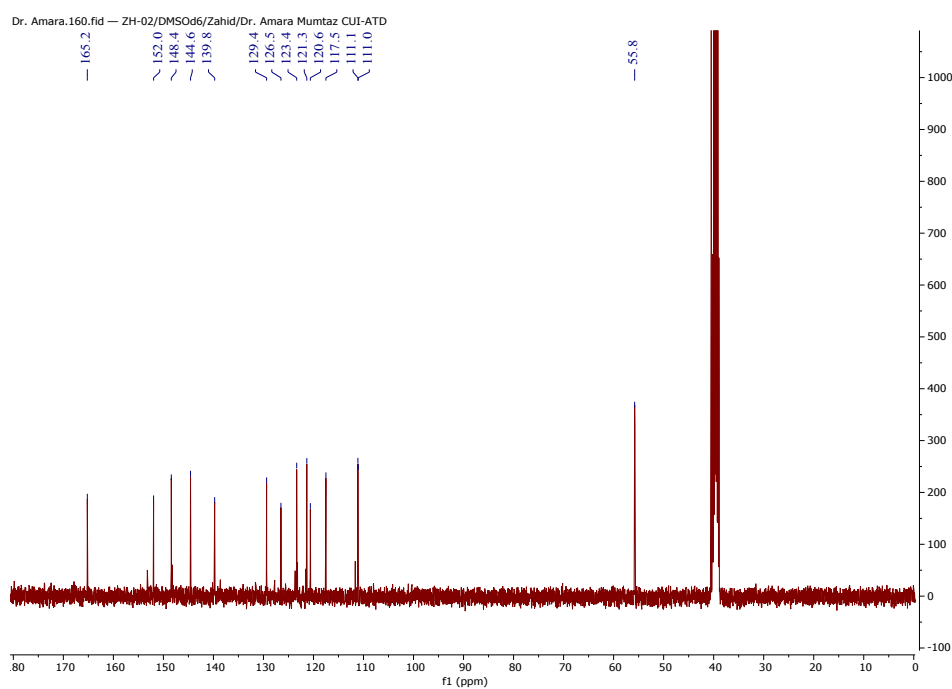

Figure S16: <sup>13</sup>C NMR of compound 09

# Compound 24

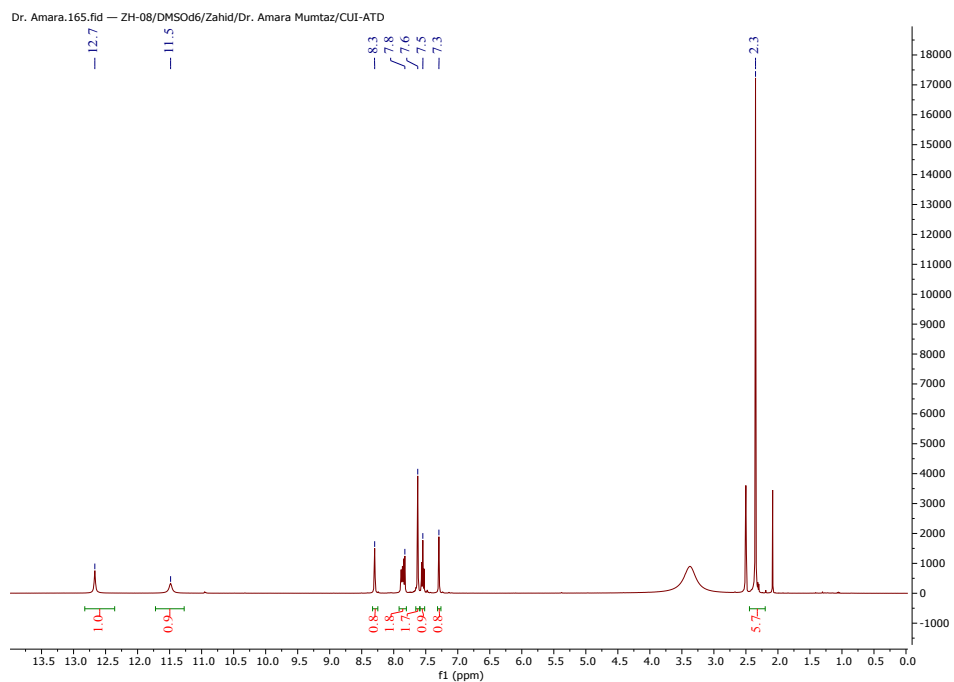

Figure S17:  $^1\text{H}$  NMR of compound 24

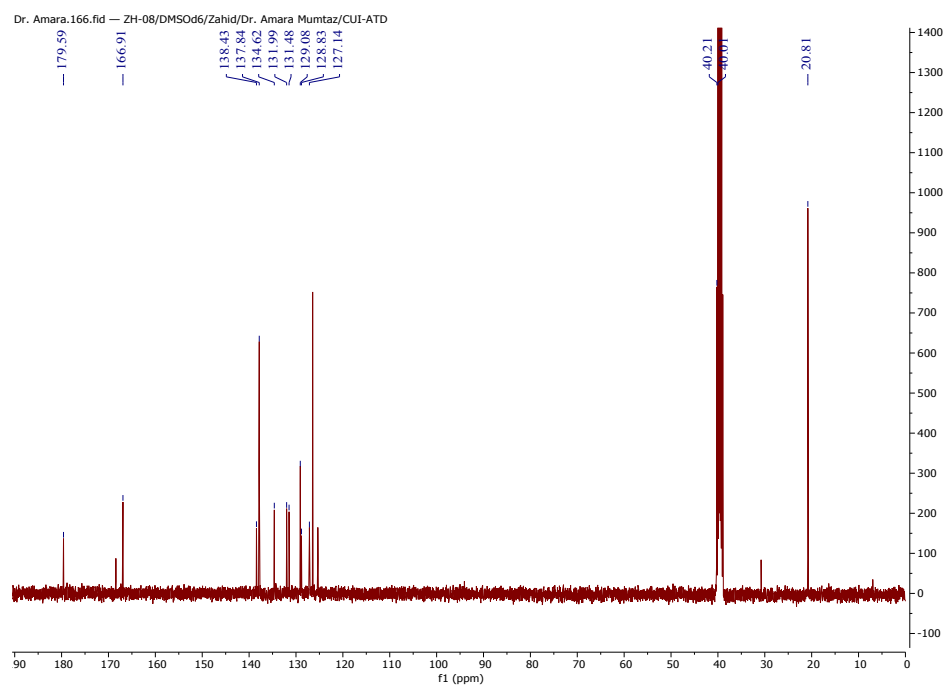

Figure S18:  $^{13}\text{C}$  NMR of compound 24

# Compound 26

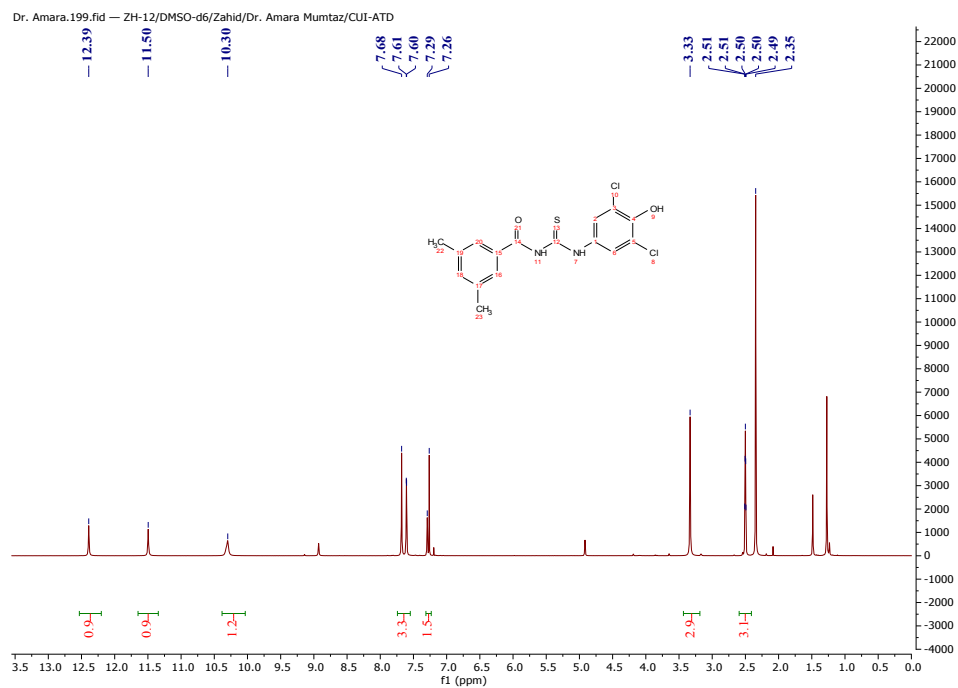

Figure S19:  $^1\text{H}$  NMR of compound 26

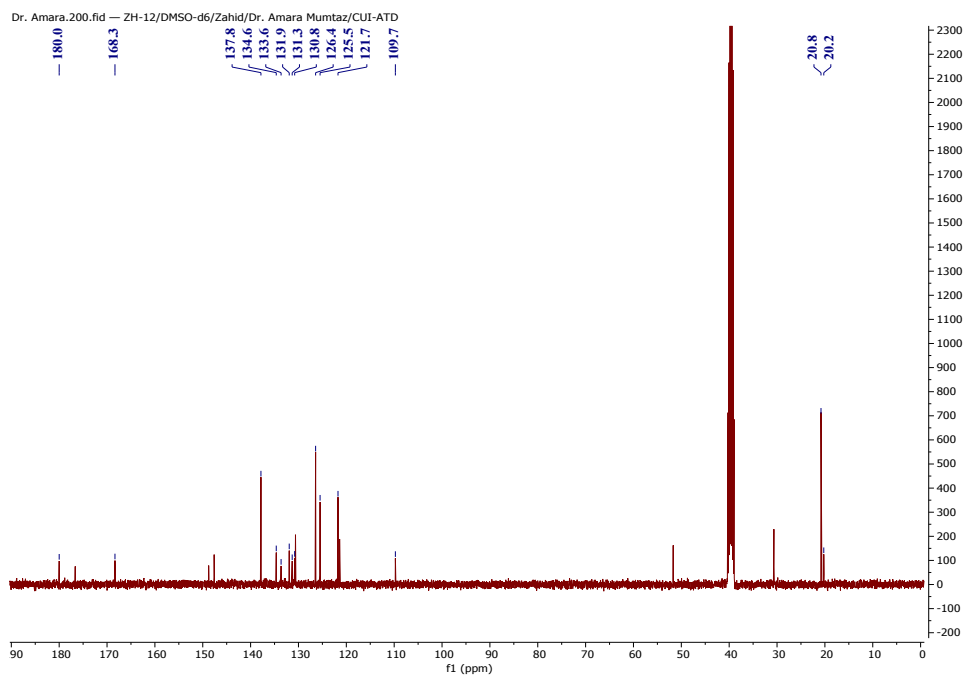

Figure S20:  $^{13}\text{C}$  NMR of compound 26

# Compound 10

Dr. Amara.203.fid — ZH-14/DMSO-d6/Zahid/Dr. Amara Mumtaz/CUI-ATD

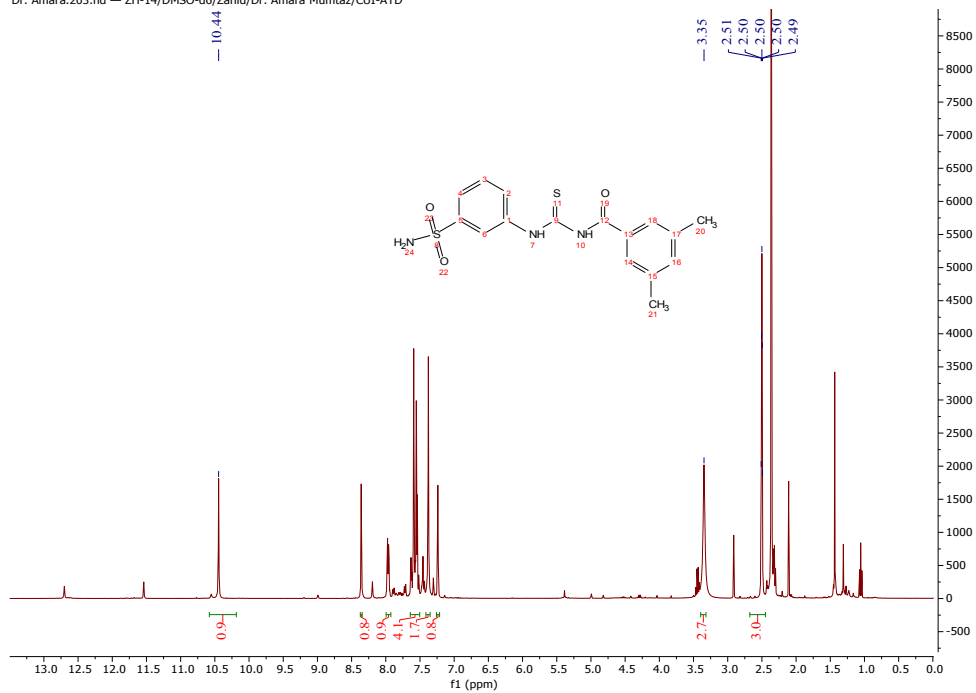

Figure S21: <sup>1</sup>H NMR of compound 10

Dr. Amara.204.fid — ZH-14/DMSO-d6/Zahid/Dr. Amara Mumtaz/CUI-ATD

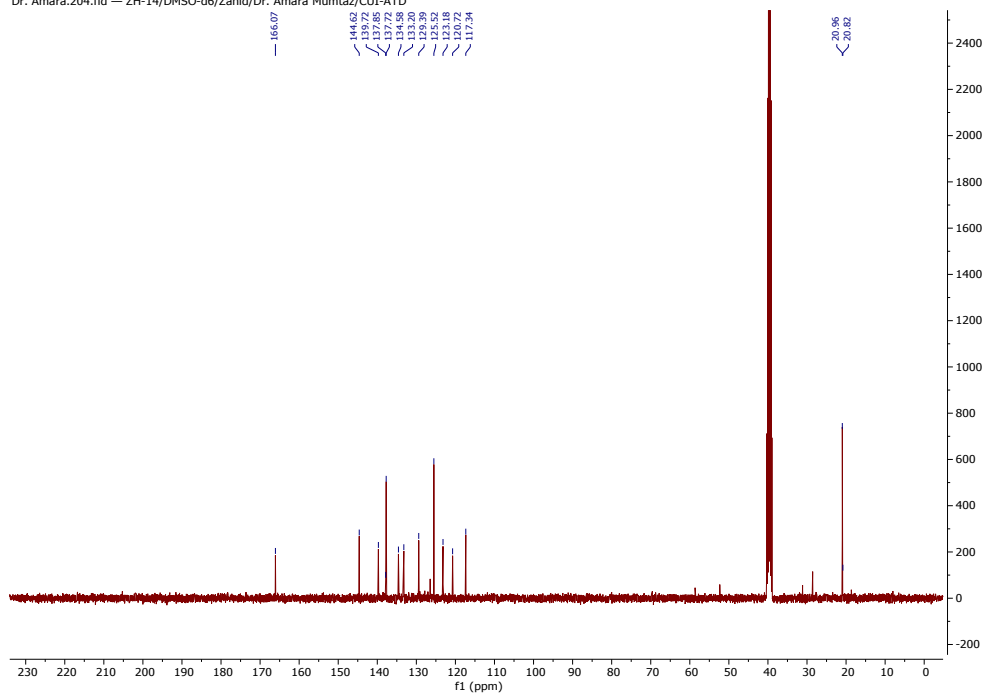

Figure S22: <sup>13</sup>C NMR of compound 10

# Compound 11

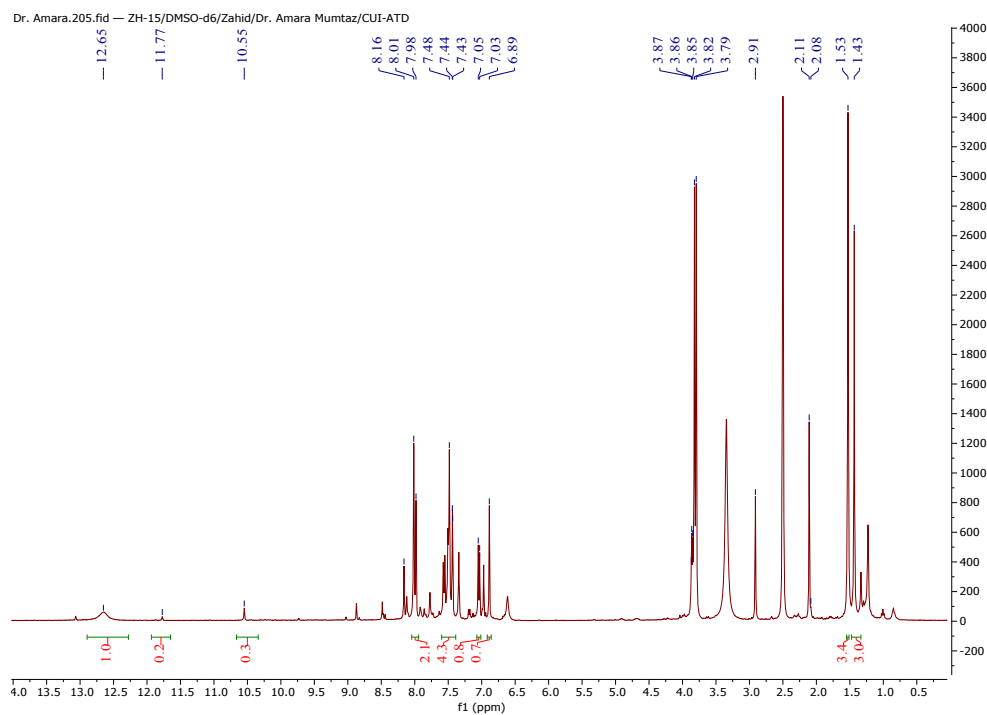

Figure S23:  $^1\text{H}$  NMR of compound 11

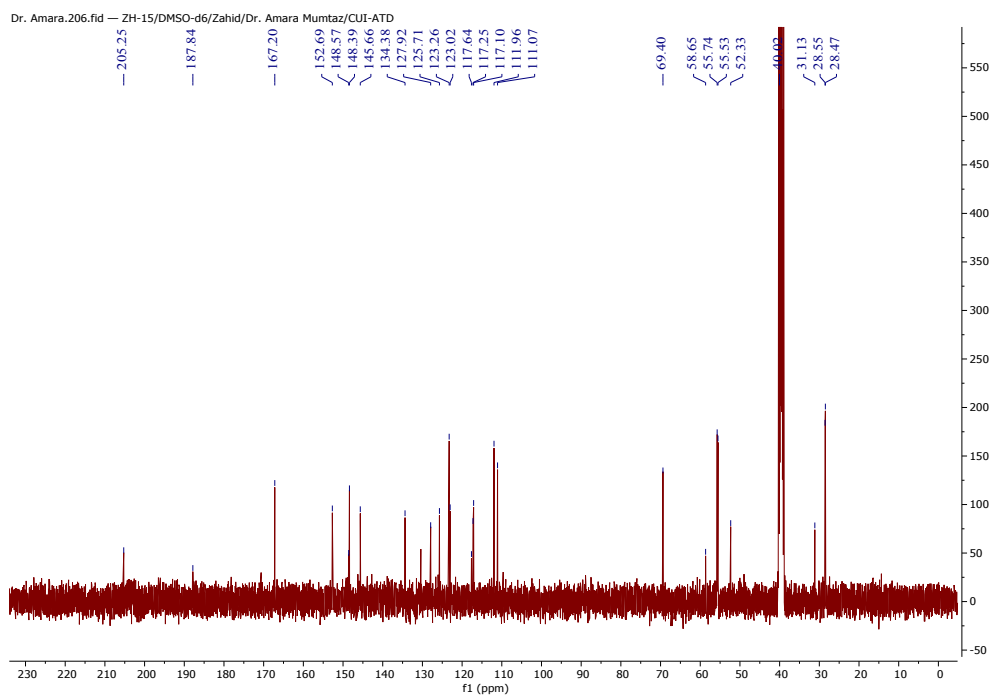

Figure S24:  $^{13}\text{C}$  NMR of compound 11

# Compound 14

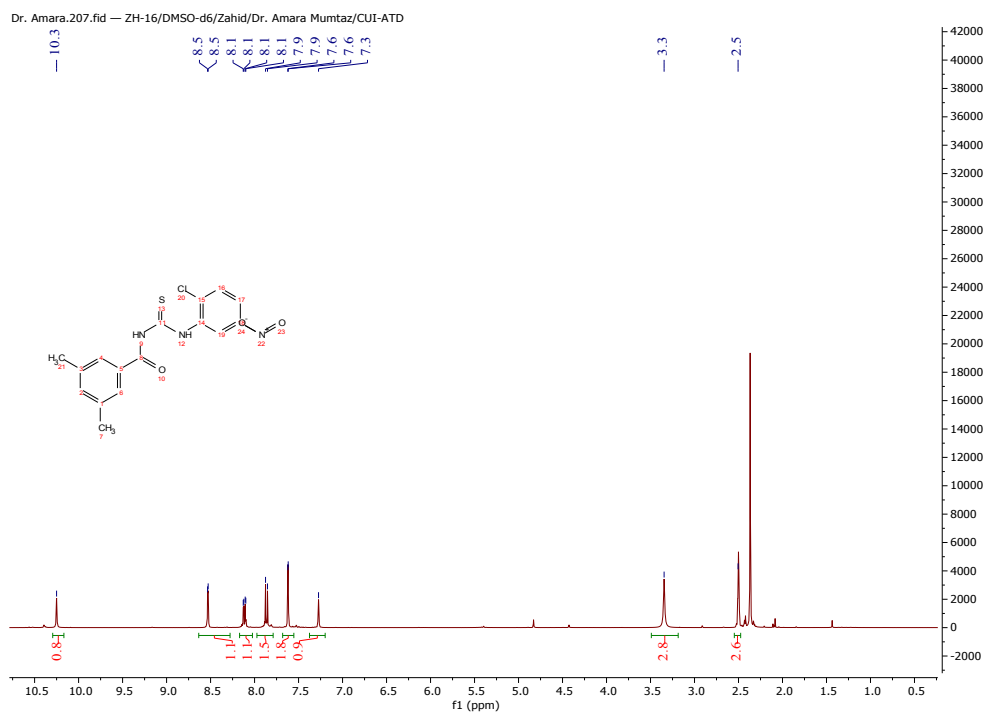

Figure S25:  $^1\text{H}$  NMR of compound 14

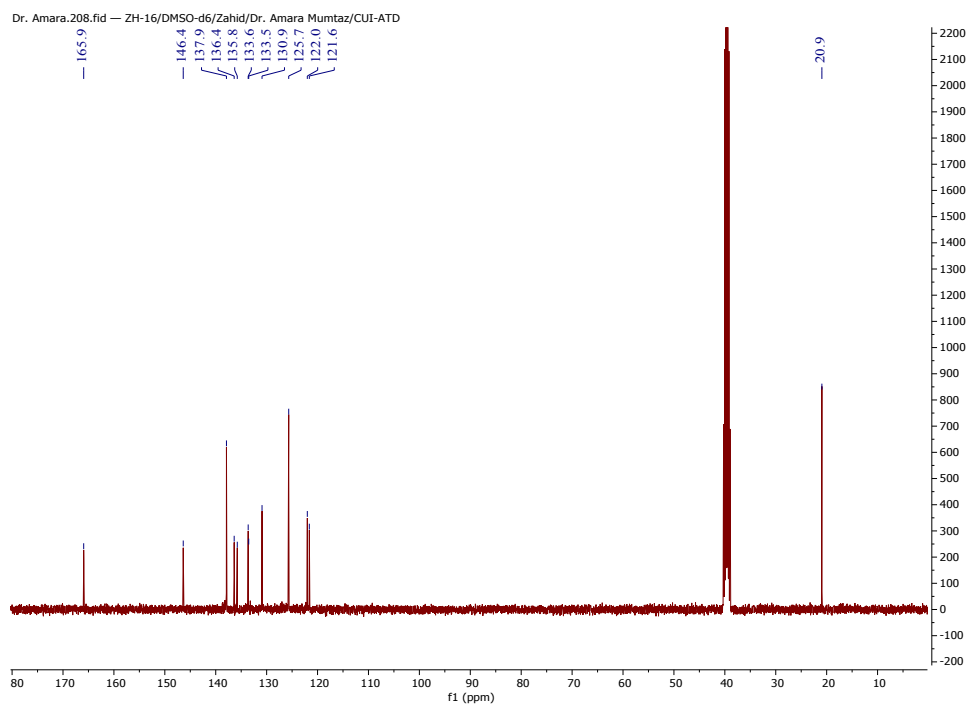

Figure S26:  $^{13}\text{C}$  NMR of compound 14

# Compound 15

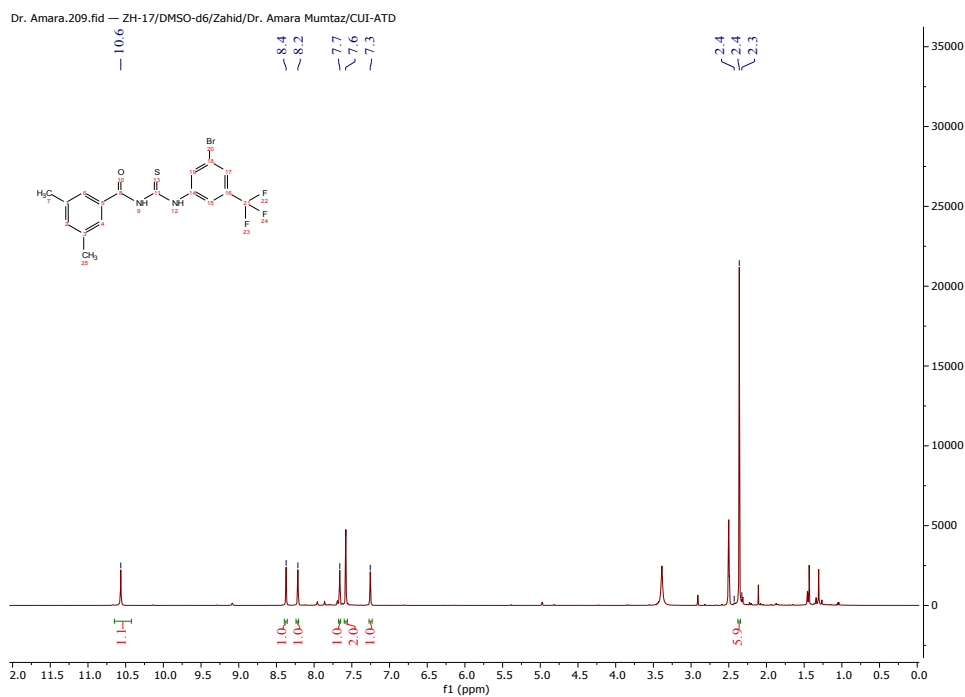

Figure S27: <sup>1</sup>H NMR of compound 15

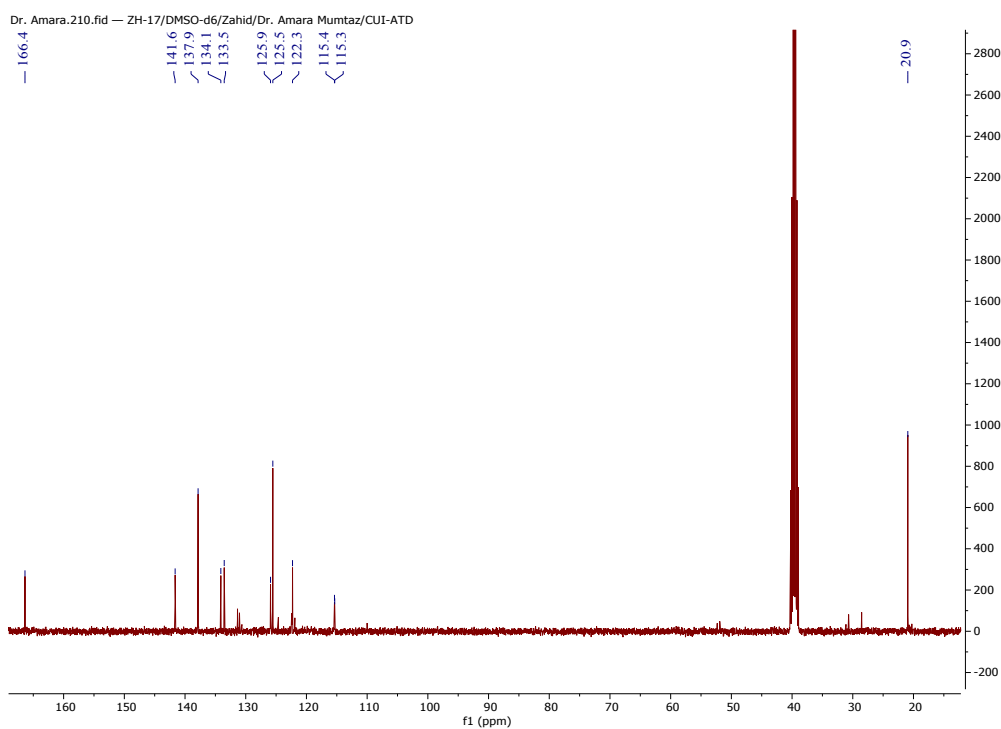

Figure S28: <sup>13</sup>C NMR of compound 15



# Compound 25

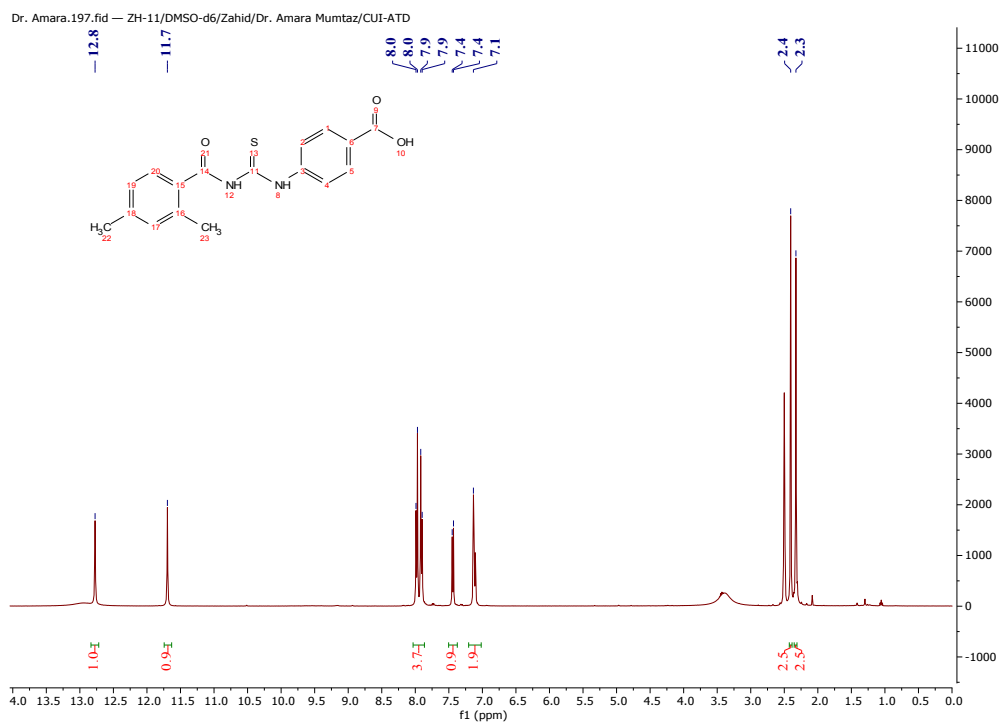

Figure S29:  $^1\text{H}$  NMR of compound 25

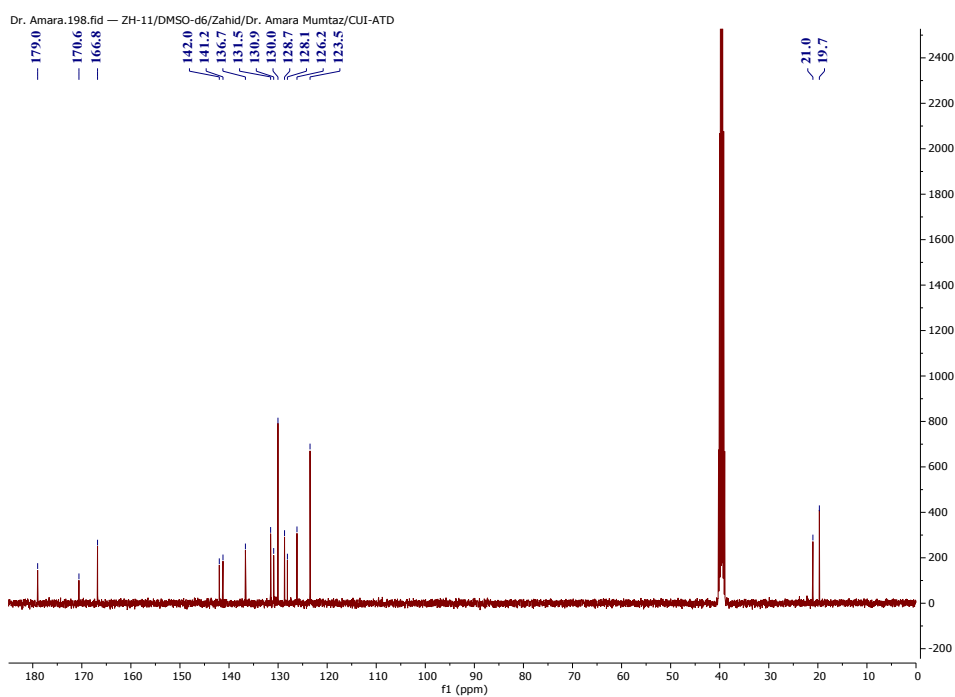

Figure S30:  $^{13}\text{C}$  NMR of compound 25

# Compound 13

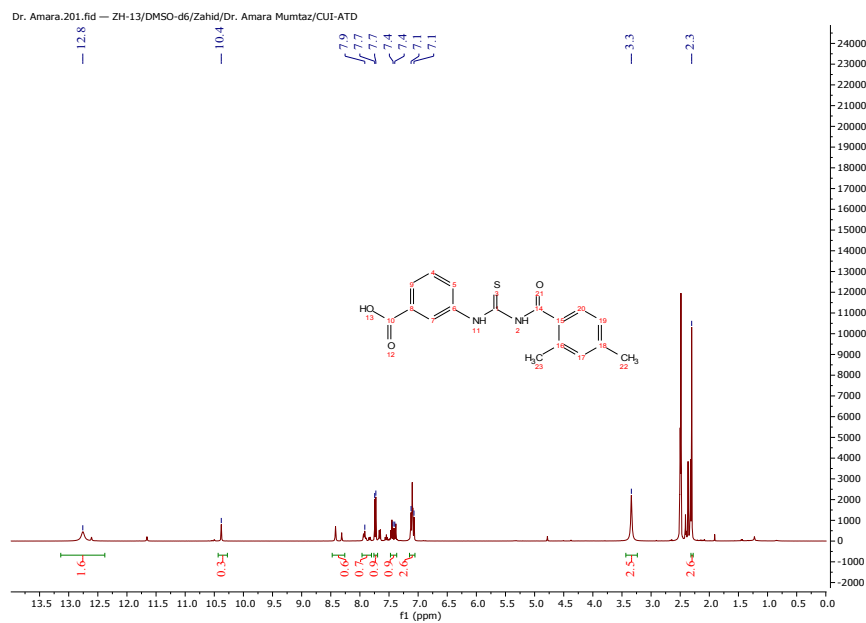

Figure S31:  $^1\text{H}$  NMR of compound 13

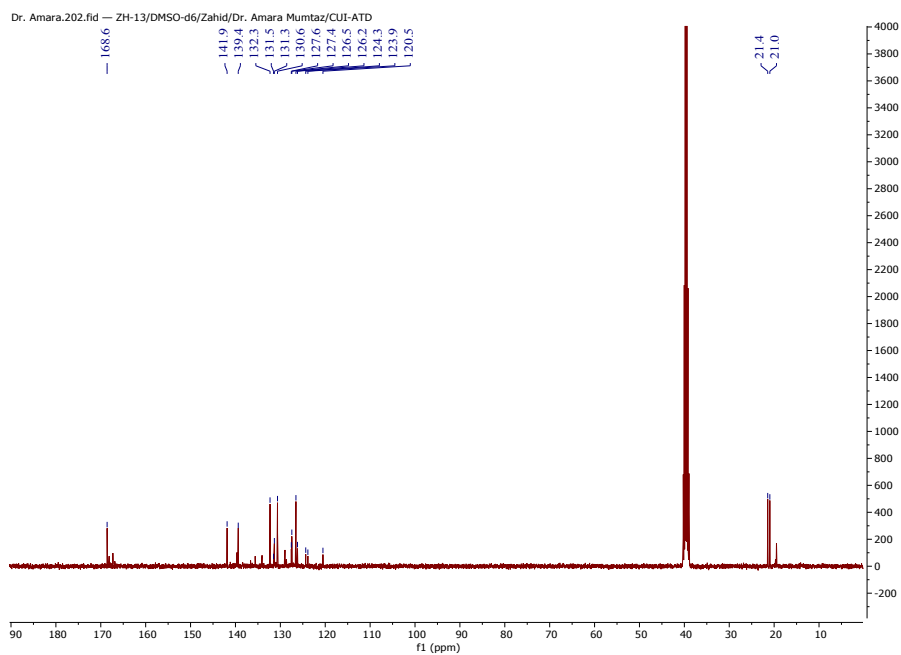

Figure S32:  $^{13}\text{C}$  NMR of compound 13

## 2 Supporting IR spectra of the synthesized compounds

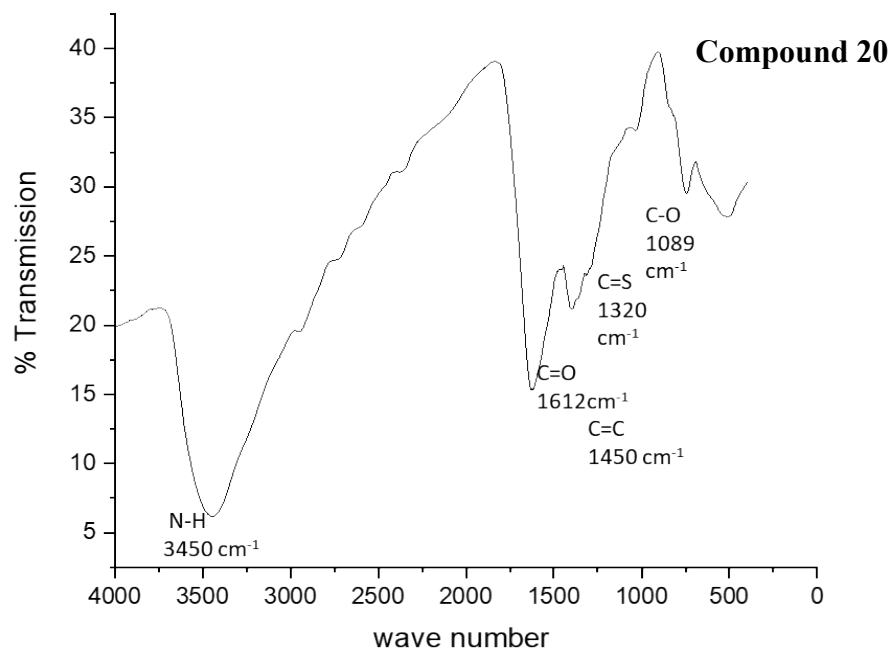

Figure S33: IR graph of Compound 20

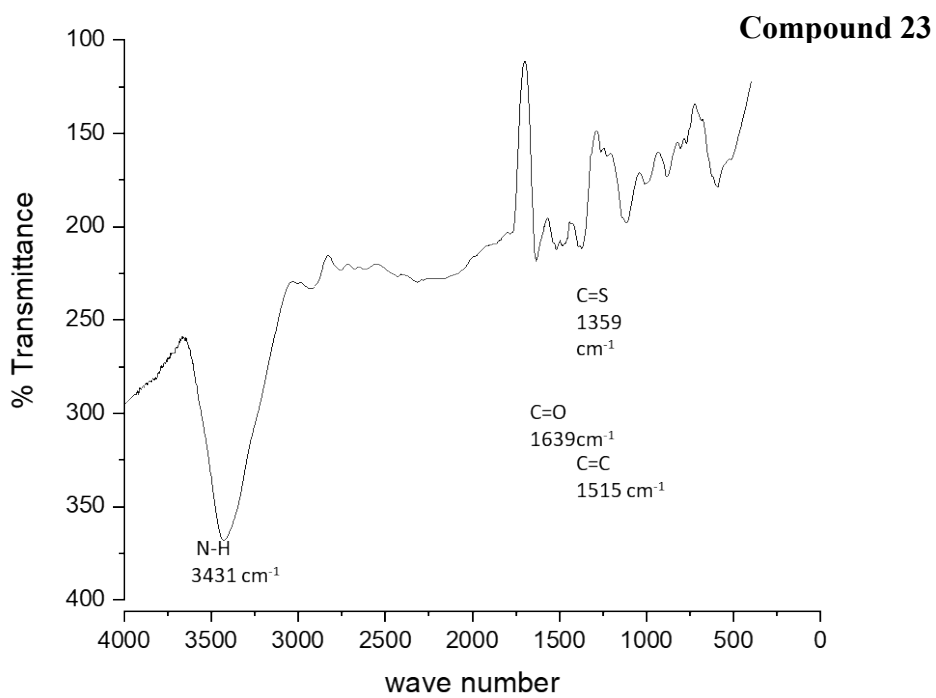

Figure S34: IR graph of Compound 23

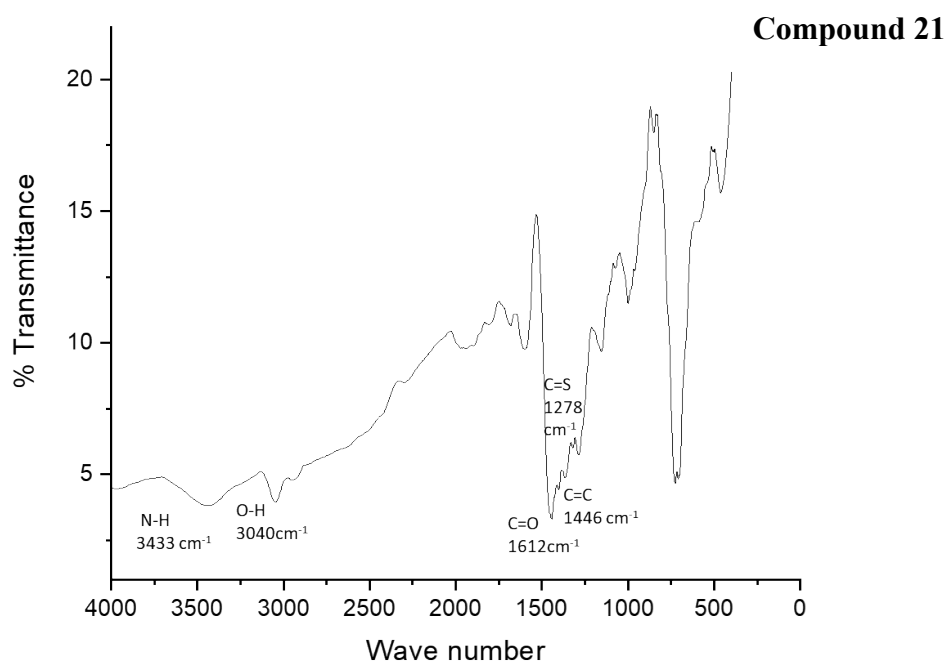

Figure S35: IR graph of Compound 21

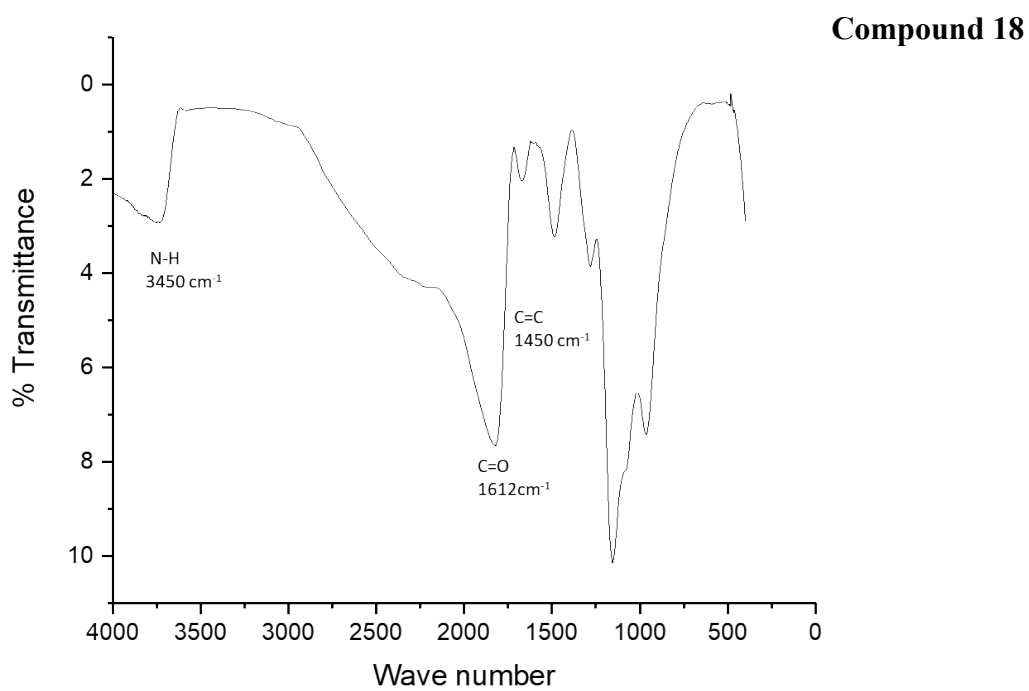

Figure S36: IR graph of Compound 18

### Compound 17

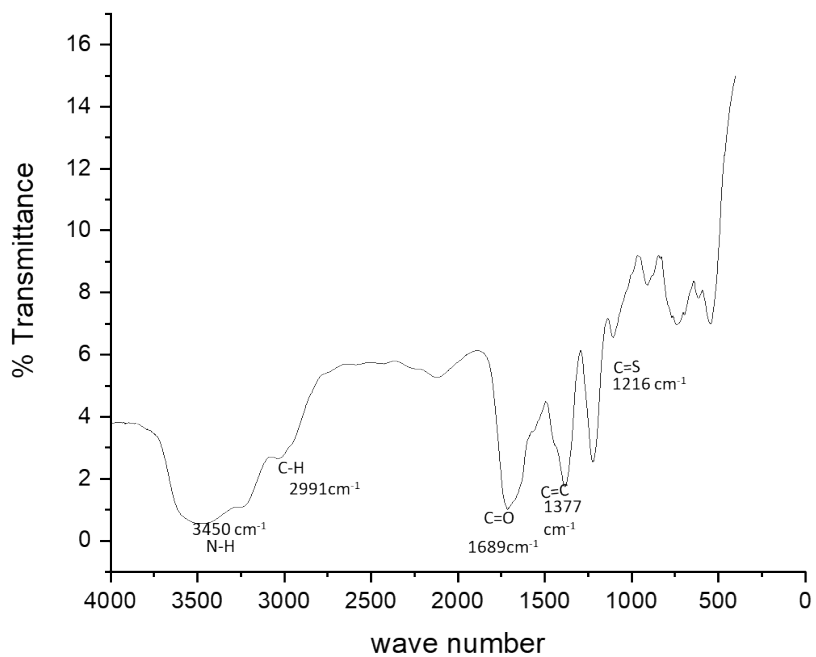

Figure S37: IR graph of Compound 17

### Compound 12

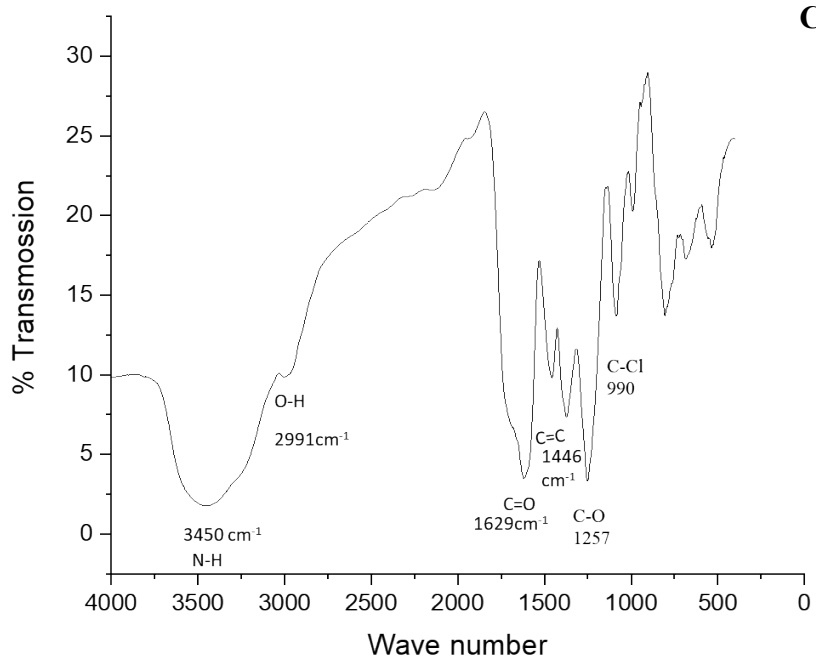

Figure S38: IR graph of Compound 12

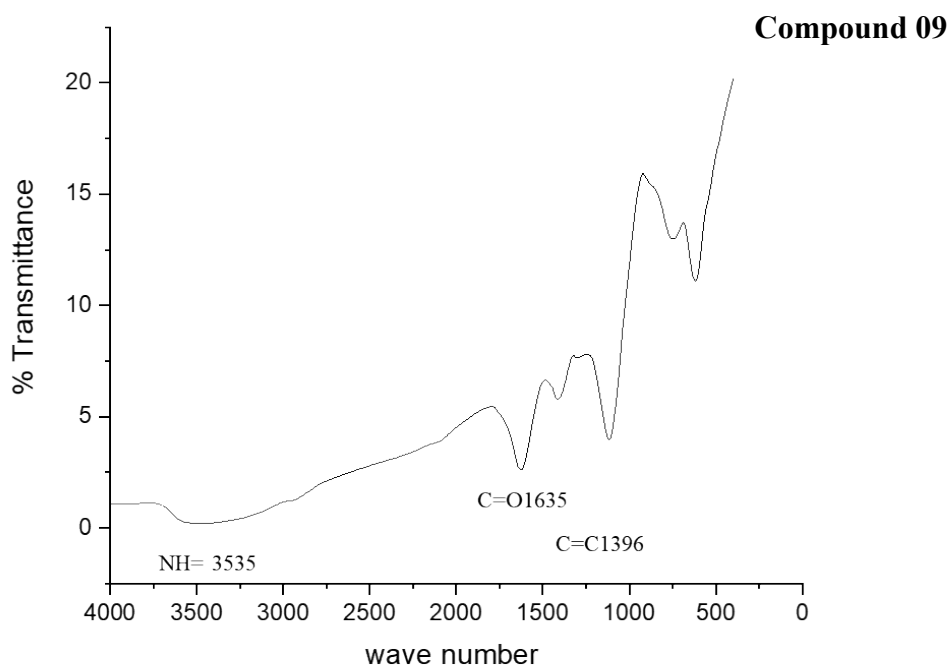

Figure S39: IR graph of Compound 20

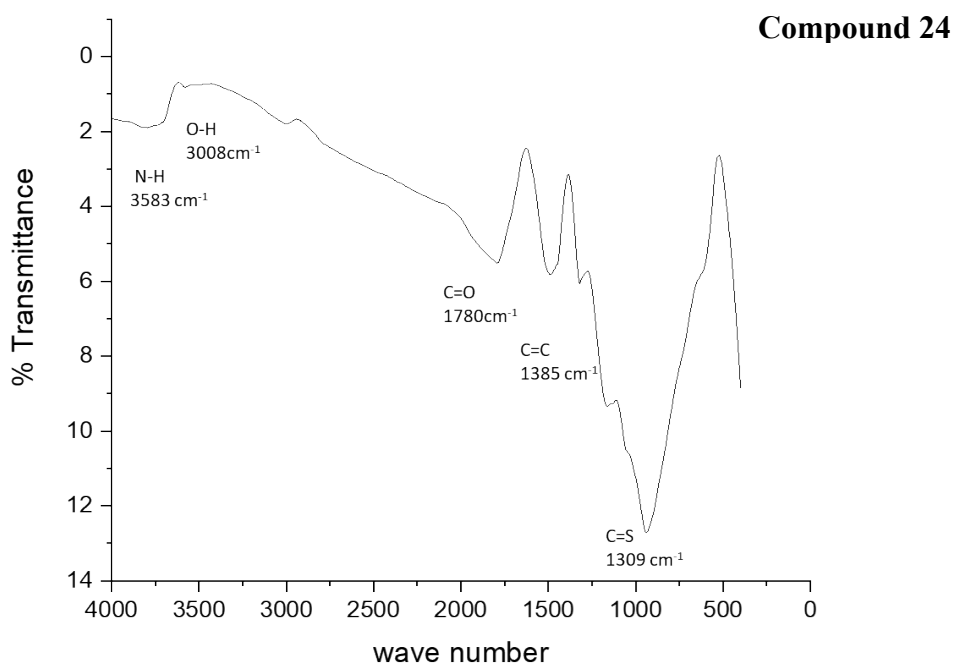

Figure S40: IR graph of Compound 24

### Compound 26

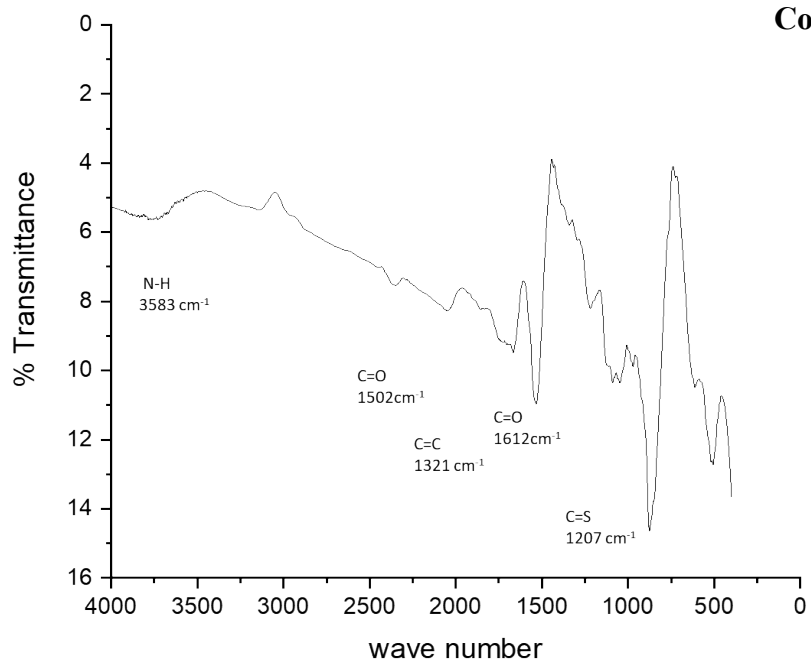

Figure S41: IR graph of Compound 26

### Compound 10

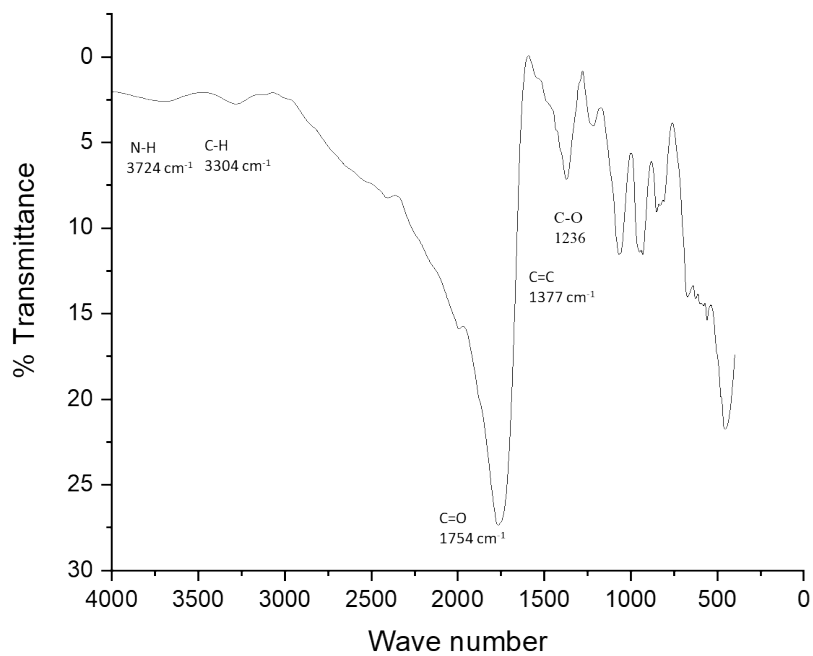

Figure S42: IR graph of Compound 10

### Compound 11

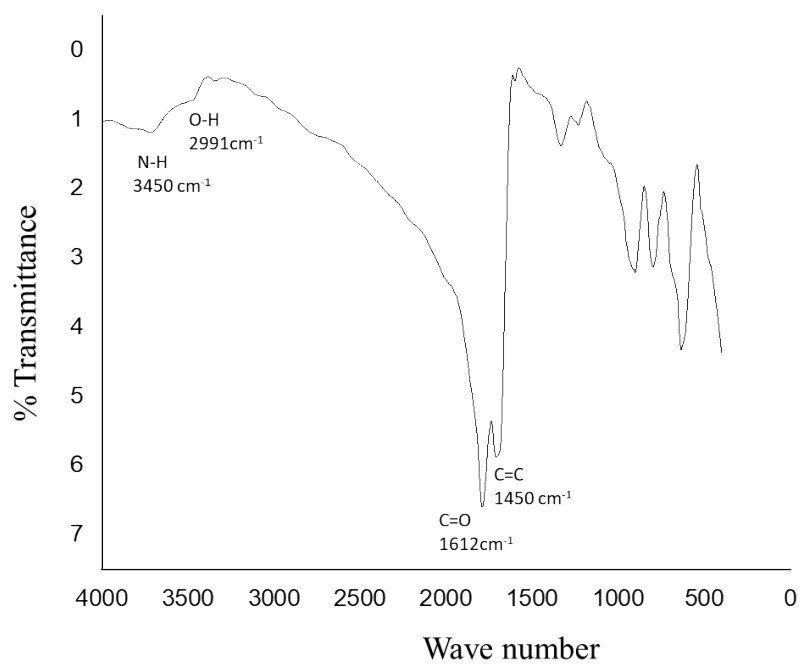

Figure S43: IR graph of Compound 11

### Compound 14

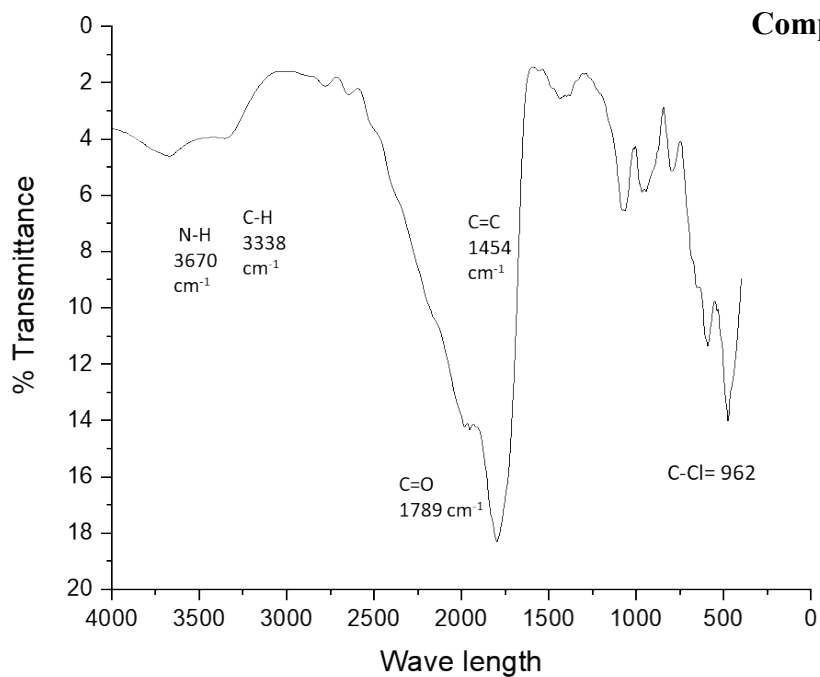

Figure S44: IR graph of Compound 14



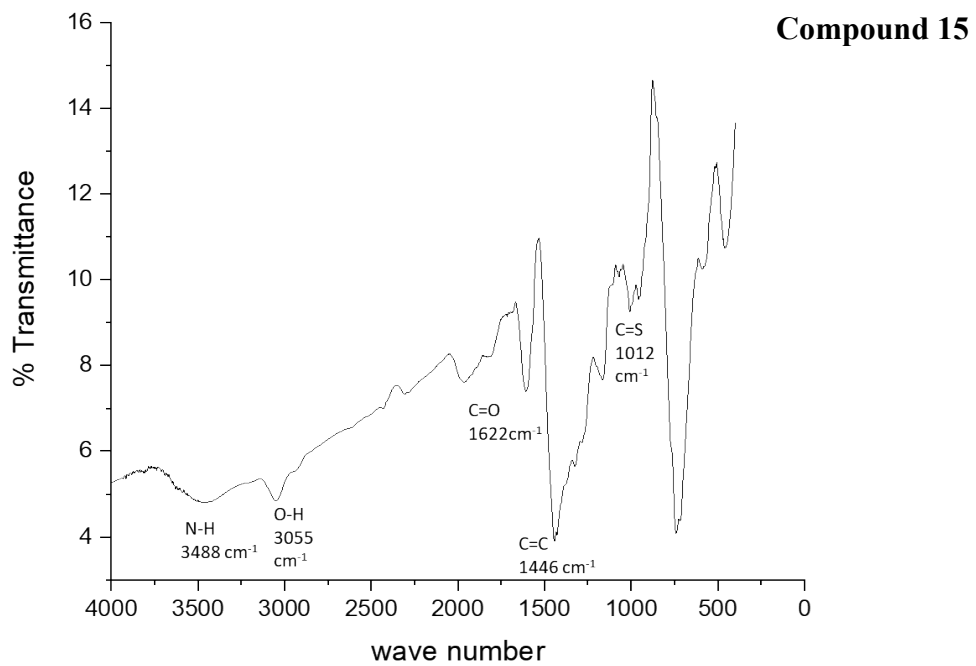

Figure S45: IR graph of Compound 15

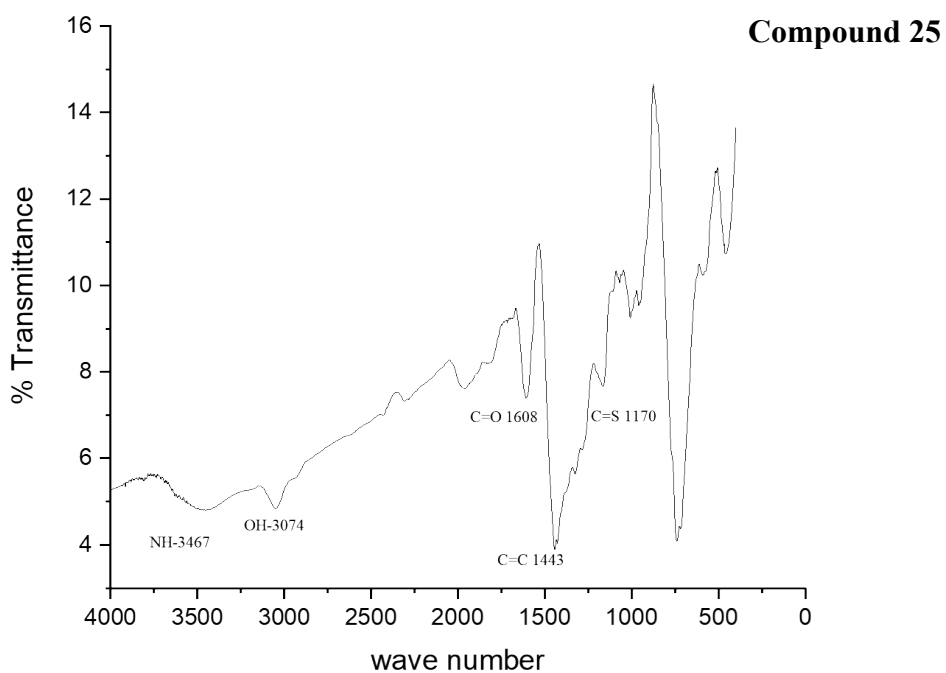

Figure S46: IR graph of Compound 25

**Compound 13**

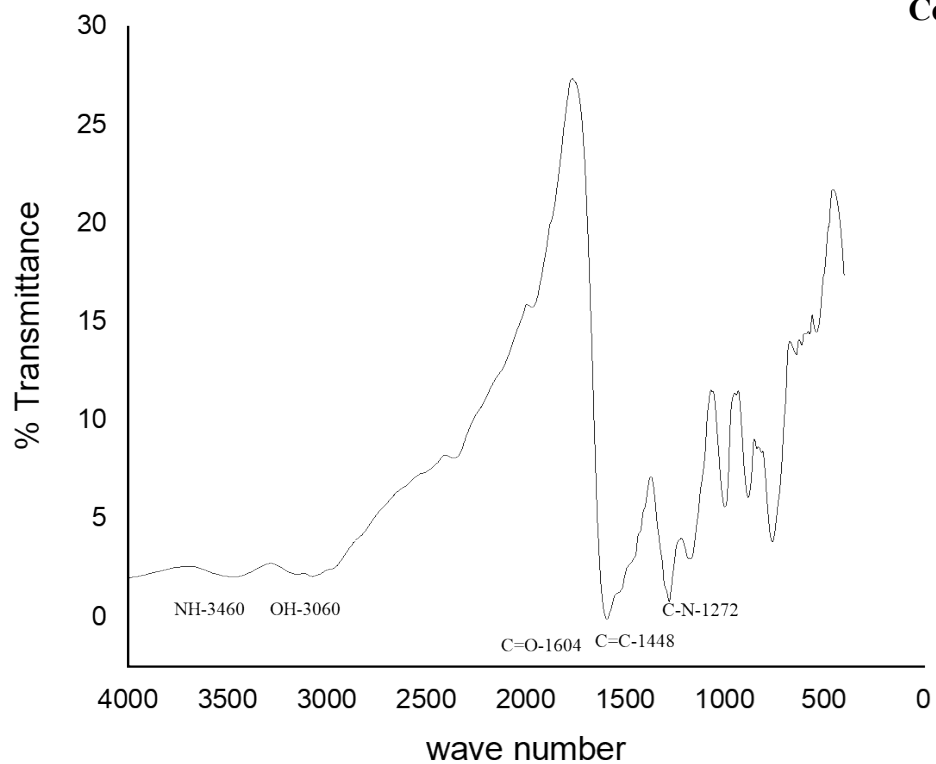

Figure S47: IR graph of Compound 20

# HPLC Chromatogram

mV

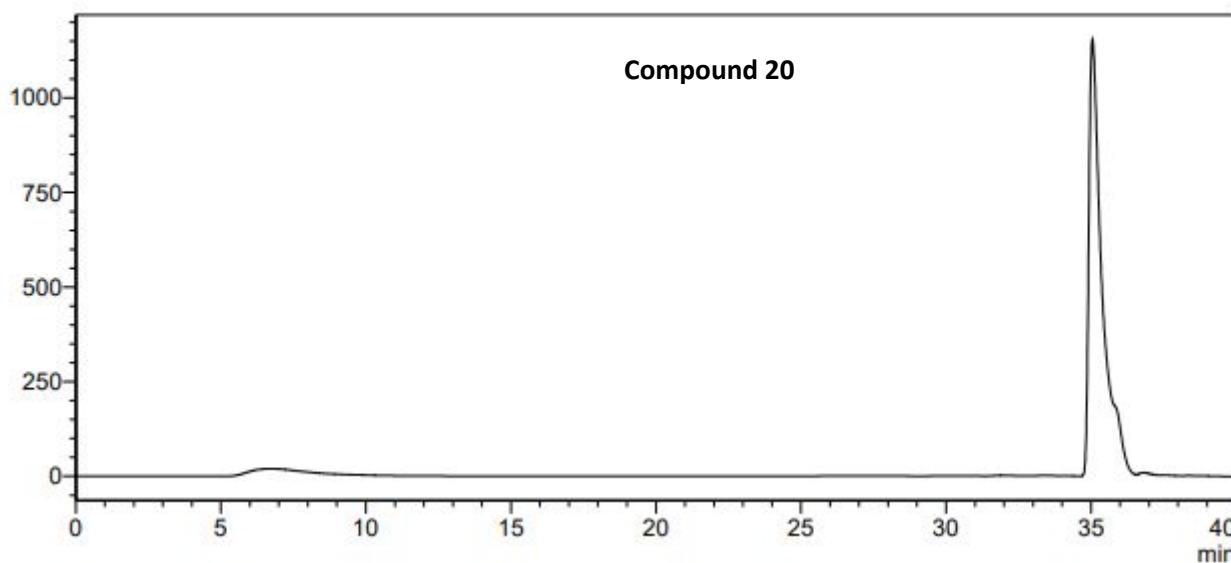

<Chromatogram>

mV

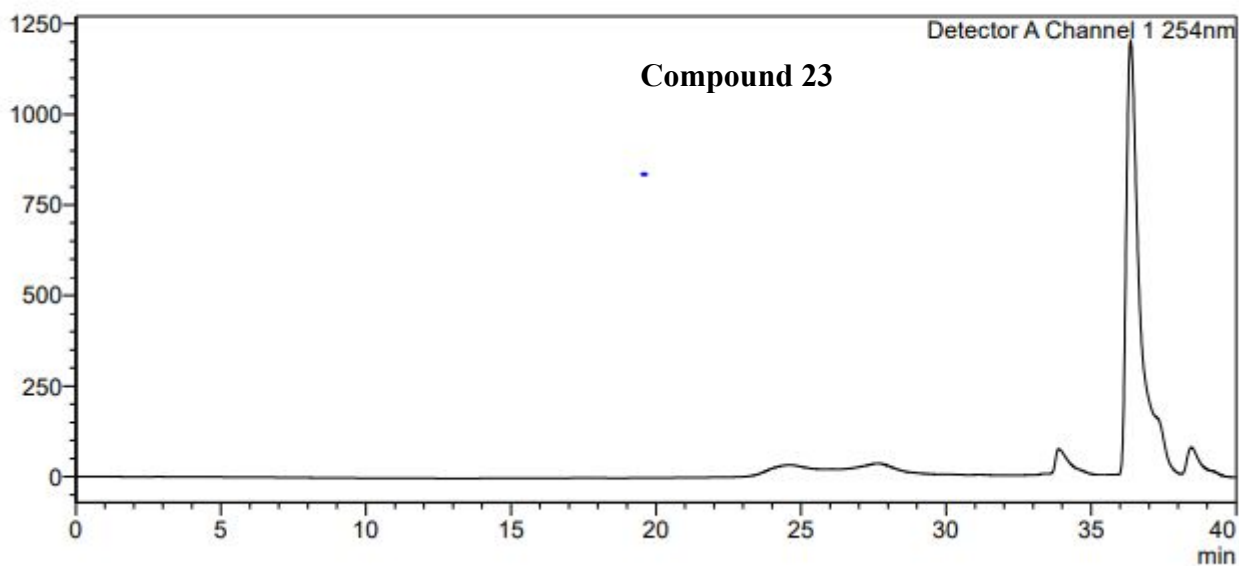

Figure S48: HPLC chromatogram of compound 20 and 23

### 3 *In-vitro* studies of the synthesized compounds and their IC<sub>50</sub> values.

Table S1: IC<sub>50</sub> values and Graphs of hCA II

| h-Carbonic Anhydrase-II (hCA-II) |                                                                                                                     |                                                                                      |                  |
|----------------------------------|---------------------------------------------------------------------------------------------------------------------|--------------------------------------------------------------------------------------|------------------|
| Compounds                        | Structure                                                                                                           | Graph                                                                                | IC <sub>50</sub> |
| 09                               | 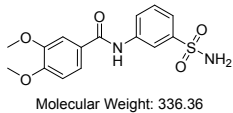 <p>Molecular Weight: 336.36</p>   |    | 0.18 ± 0.05      |
| 10                               |  <p>Molecular Weight: 304.36</p>   |    | 0.93 ± 0.05      |
| 11                               |  <p>Molecular Weight: 244.66</p> |   | 1.18 ± 0.14      |
| 14                               |  <p>Molecular Weight: 304.73</p> |  | 6.49 ± 0.63      |
| 15                               |  <p>Molecular Weight: 372.19</p> |  | 1.93 ± 0.15      |

|    |                                                                                                                     |                                                                                      |                  |
|----|---------------------------------------------------------------------------------------------------------------------|--------------------------------------------------------------------------------------|------------------|
| 17 | 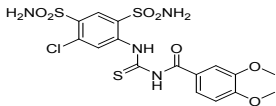 <p>Molecular Weight: 508.96</p>   |    | $11.51 \pm 0.16$ |
| 18 |  <p>Molecular Weight: 360.38</p>   |    | $4.17 \pm 0.29$  |
| 19 |  <p>Molecular Weight: 474.71</p>   |   | $0.72 \pm 0.06$  |
| 22 |  <p>Molecular Weight: 395.81</p> |  | $0.26 \pm 0.03$  |
| 24 |  <p>Molecular Weight: 300.38</p> |  | $1.24 \pm 0.96$  |
| 25 |  <p>Molecular Weight: 328.39</p> |  | $0.38 \pm 0.01$  |

26

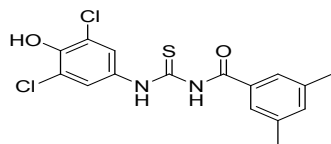

Molecular Weight: 369.26

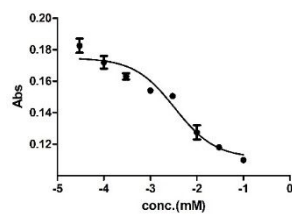

$4.45 \pm 0.11$

Table S2: IC<sub>50</sub> vales and Graphs of hCA IX

| Human Carbonic Anhydrase IX (hCA-IX) |                                                                                                                     |                                                                                      |                  |
|--------------------------------------|---------------------------------------------------------------------------------------------------------------------|--------------------------------------------------------------------------------------|------------------|
| Compounds                            | STRUCTURE                                                                                                           | GRAPH                                                                                | IC <sub>50</sub> |
| 10                                   | 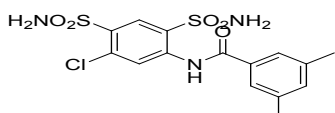 <p>Molecular Weight: 244.66</p>   |    | 14.58 ± 1.07     |
| 11                                   |  <p>Molecular Weight: 304.73</p>   |    | 0.17 ± 0.05      |
| 13                                   |  <p>Molecular Weight: 269.30</p>   |   | 10.36 ± 1.45     |
| 17                                   |  <p>Molecular Weight: 508.96</p> |  | 1.71 ± 0.65      |
| 18                                   |  <p>Molecular Weight: 360.38</p> |  | 0.21 ± 0.09      |
| 19                                   |  <p>Molecular Weight: 474.71</p> |  | 1.01 ± 0.05      |
| 22                                   |  <p>Molecular Weight: 395.81</p> |  | 4.93 ± 1.83      |

|    |                                                                                                                   |                                                                                    |                 |
|----|-------------------------------------------------------------------------------------------------------------------|------------------------------------------------------------------------------------|-----------------|
| 24 | 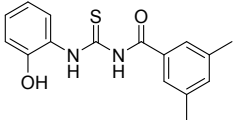 <p>Molecular Weight: 300.38</p> |  | $1.25 \pm 0.02$ |
| 25 |  <p>Molecular Weight: 328.39</p> |  | $9.76 \pm 1.03$ |
| 26 |  <p>Molecular Weight: 369.26</p> |  | $1.28 \pm 0.09$ |



Table S3: IC<sub>50</sub> vales and Graphs of hCA XII

| h-Carbonic Anhydrase-XII (hCA-XII) |                                                                                                                 |                                                                                      |                  |
|------------------------------------|-----------------------------------------------------------------------------------------------------------------|--------------------------------------------------------------------------------------|------------------|
| Compounds                          | STRUCTURE                                                                                                       | GRAPH                                                                                | IC <sub>50</sub> |
| Compound 10                        | 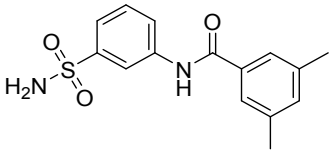                               |    | 9.17 ± 0.85      |
| Compound 11                        |                                |    | 2.99 ± 0.32      |
| Compound 12                        |                                |    | 0.58 ± 0.06      |
| Compound 14                        |                              |  | 0.95 ± 0.08      |
| Compound 15                        |                              |  | 1.05 ± 0.11      |
| Compound 18                        | <br>Molecular Weight: 360.38 |  | 1.68 ± 0.15      |
| Compound 22                        |                              |  | 4.29 ± 0.24      |

|             |                                                                                   |                                                                                    |                 |
|-------------|-----------------------------------------------------------------------------------|------------------------------------------------------------------------------------|-----------------|
| Compound 24 | 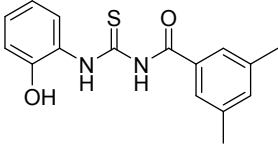 |  | $9.90 \pm 0.66$ |
| Compound 26 |  |  | $2.02 \pm 0.28$ |

#### 4 Cell Viability assay

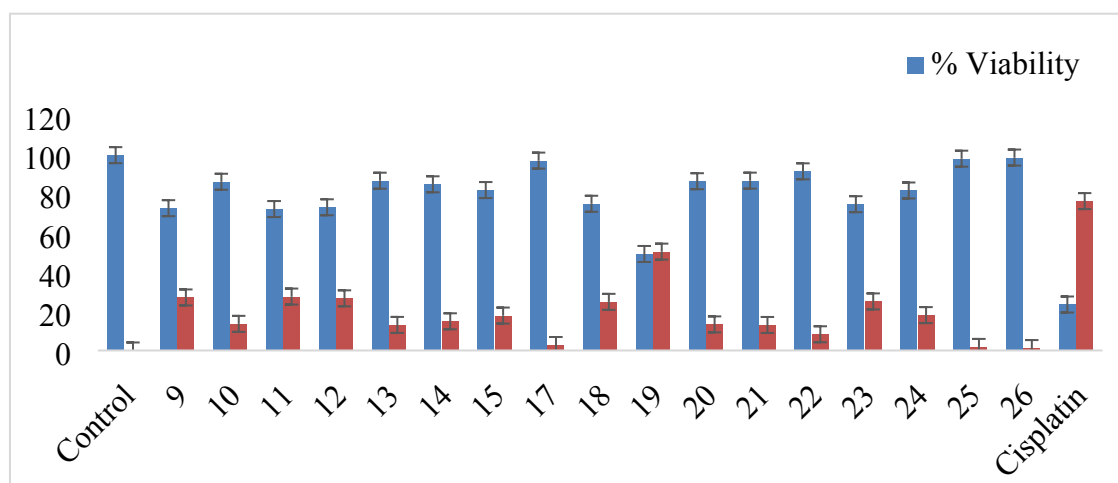

Figure S49: Analysis of cell viability/cytotoxicity using HEK-293 cells treated with compounds 1 –17 at final concentration (100  $\mu$ M). Statistics indicating significant values \* $p < 0.05$ , \*\* $p < 0.01$ , \*\*\* $p < 0.001$  vs. untreated group. Cisplatin (100  $\mu$ M) is used as a positive control.

## 5 Docking interaction of the synthesized compounds

2D interaction of the compounds **09** and **11**

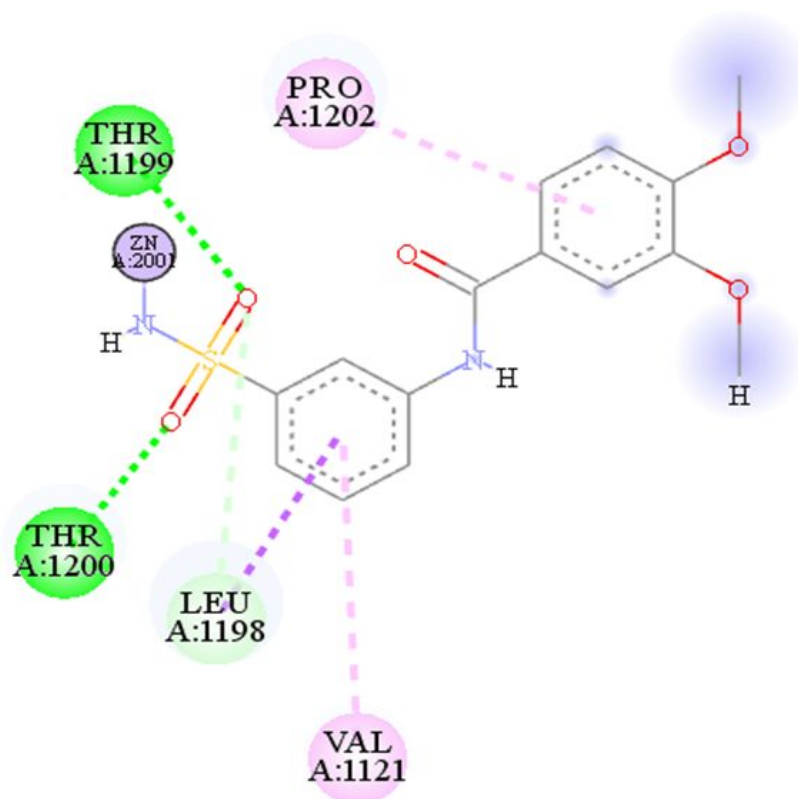

Figure S50: 2D interaction of Compound **09**

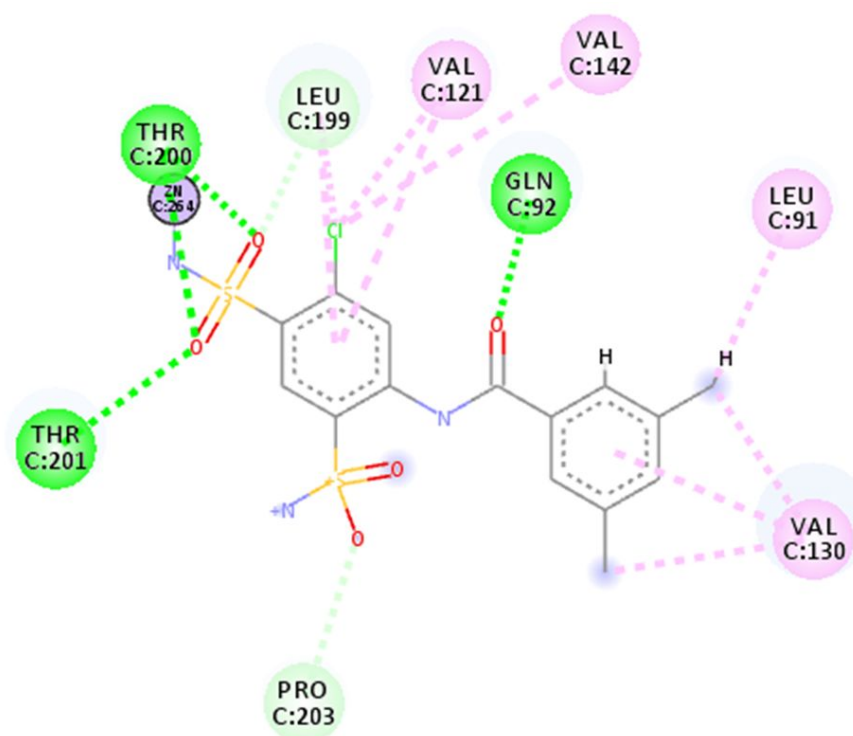

Figure S51: 2D interaction and geometrical graph of compound **11**

Interaction of compounds **12** and **18** against hCA XII

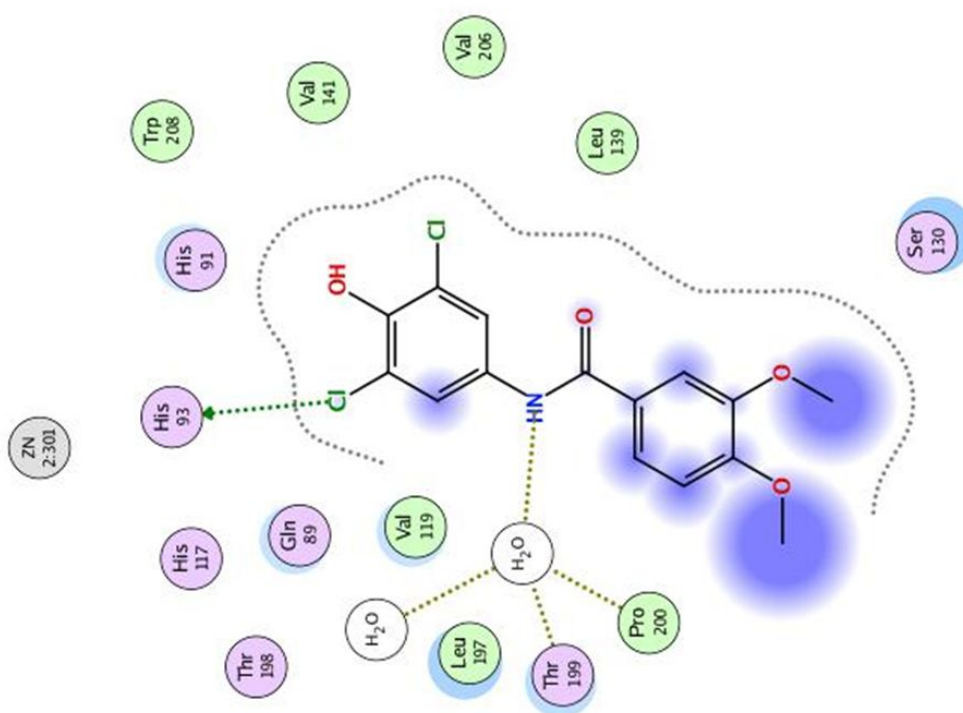

Figure S52: 2D interaction Compound 12

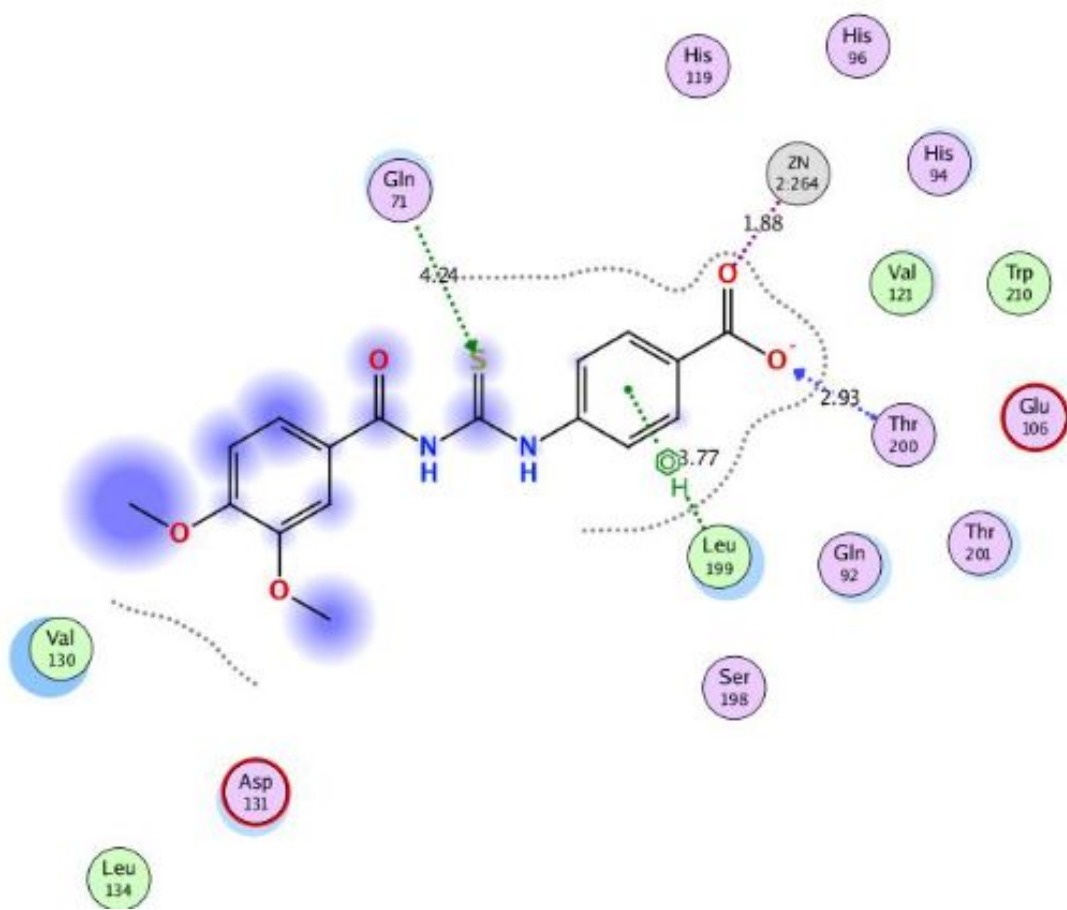

Figure S53: 2D interaction Compound 18
